# Supplementary material for: Essential Cytoplasmic Role of the Histone Lysine Methyltransferase Setdb1 in Post-Transcriptional Regulation in Embryonic Stem Cells
Source: Research Square preprint supplement (doi:10.21203/rs.3.rs-145869/v1), 2021-02-05
Supplement: Supplementary file 1 [file 4c26d4c5cfab105ef4049290.xlsx]

## Sheet: logFC1.5
Table 1, Rapone et al. (supporting Figure 2A): Differentially expressed genes by comparing RNA-seq data from biological triplicates in KO-NLS versus KO+WT ESCs using using Dseq2 package (Log2FC treshold of 1.5; p <0.01)
Gene_ID	baseMean	log2FoldChange	lfcSE	stat	pvalue	padj
Rian	213.287	-4.49157	0.210817	-21.3056	1.00727e-100	1.70956e-97
Cubn	224.449	-3.65849	0.182008	-20.1007	7.27543e-90	8.64357e-87
Meg3	63.84	-3.11095	0.269533	-11.542	8.10342e-31	9.92502e-29
Srgn	38.543	-2.58003	0.273568	-9.43104	4.06049e-21	2.79656e-19
Mirg	32.4334	-2.22047	0.279462	-7.94553	1.93357e-15	8.5397e-14
Pdgfra	79.008	-2.21833	0.217771	-10.1865	2.27763e-24	1.87262e-22
Gm37899	19.4748	-2.21248	0.297972	-7.42512	1.12674e-13	4.08115e-12
Col23a1	110.612	-2.13636	0.235748	-9.06206	1.28013e-19	7.94183e-18
Zfp521	85.7803	-2.05134	0.207684	-9.87722	5.22649e-23	3.90524e-21
Gm38162	67.1038	-2.03292	0.257551	-7.89327	2.94376e-15	1.27407e-13
Gm38387	50.0371	-2.01982	0.267746	-7.54379	4.56497e-14	1.73549e-12
AL591892,1	48.7984	-2.01819	0.267686	-7.5394	4.72143e-14	1.78356e-12
Col4a2	319.727	-1.98965	0.135073	-14.7302	4.12245e-49	1.28886e-46
Gm37570	66.8536	-1.91722	0.265596	-7.21856	5.25422e-13	1.79153e-11
Gm12002	47.3211	-1.90391	0.259332	-7.34158	2.11081e-13	7.49702e-12
Gm38001	48.4866	-1.90044	0.271064	-7.01104	2.36549e-12	7.38586e-11
Fgf1	119.125	-1.88667	0.184886	-10.2045	1.89247e-24	1.56679e-22
Gm15533	23.2672	-1.87205	0.294004	-6.36742	1.9223e-10	4.62305e-09
H19	28.814	-1.85211	0.2794	-6.62887	3.38274e-11	8.99075e-10
P2ry14	36.4648	-1.83807	0.276912	-6.63775	3.18512e-11	8.54194e-10
Dixdc1	184.82	-1.82314	0.159836	-11.4063	3.88898e-30	4.55202e-28
Gm43019	41.138	-1.82266	0.281416	-6.47674	9.37237e-11	2.3368e-09
Cobl	2195.43	-1.80989	0.0703106	-25.7414	4.02382e-146	1.36586e-142
Gm48889	34.1884	-1.80649	0.283173	-6.37948	1.77686e-10	4.29065e-09
Gm37621	35.4915	-1.79627	0.280901	-6.39466	1.60905e-10	3.90527e-09
Aspn	65.7822	-1.79289	0.2639	-6.79381	1.09211e-11	3.12646e-10
Gm43164	42.5437	-1.78216	0.266944	-6.67617	2.45268e-11	6.66797e-10
Col4a1	877.979	-1.78161	0.0956781	-18.6209	2.1746e-77	1.61471e-74
Dglucy	21.06	-1.77761	0.290842	-6.11196	9.84157e-10	2.12394e-08
Kit	560.245	-1.77334	0.114683	-15.463	6.16498e-54	2.32518e-51
4930517O19Rik	63.9516	-1.77301	0.24744	-7.16541	7.75558e-13	2.59185e-11
Ly75	447.431	-1.76333	0.112927	-15.6148	5.77184e-55	2.32449e-52
Lrrc31	28.411	-1.74873	0.279758	-6.25088	4.08155e-10	9.34313e-09
Gm37204	70.9917	-1.73891	0.263719	-6.5938	4.28696e-11	1.12307e-09
Lrrc34	765.602	-1.73116	0.103829	-16.6732	2.05281e-62	1.06037e-59
Dab2	83.1553	-1.7238	0.208018	-8.28677	1.16363e-16	5.79644e-15
C79798	28.5994	-1.71635	0.289355	-5.93164	2.99924e-09	5.98864e-08
Mipol1	258.513	-1.70919	0.13447	-12.7106	5.16409e-37	8.70241e-35
Gm47479	22.7775	-1.70131	0.295265	-5.76199	8.31259e-09	1.53113e-07
Gm43168	31.7688	-1.69991	0.28648	-5.93379	2.96024e-09	5.91576e-08
Fxyd4	53.7932	-1.69802	0.256372	-6.62327	3.51341e-11	9.31721e-10
Igsf21	210.436	-1.68918	0.154169	-10.9567	6.17127e-28	6.29337e-26
Gm15564	725.521	-1.67693	0.296829	-5.6495	1.60919e-08	2.82393e-07
Fut9	1541.18	-1.67457	0.107613	-15.561	1.33932e-54	5.13283e-52
Gm47342	17.7584	-1.6686	0.29815	-5.59652	2.18693e-08	3.74378e-07
Gm37274	59.5371	-1.66239	0.257071	-6.46667	1.00186e-10	2.48487e-09
Bcas3os1	21.2241	-1.65063	0.29626	-5.57157	2.52453e-08	4.2908e-07
Gm43984	33.6879	-1.63996	0.285319	-5.74781	9.04068e-09	1.65497e-07
Gm38009	43.9319	-1.6284	0.269255	-6.04778	1.46859e-09	3.09353e-08
Sfrp1	1798.3	-1.60546	0.0834823	-19.2311	2.03139e-82	1.93072e-79
Gm26690	113.131	-1.60336	0.234732	-6.83061	8.45563e-12	2.45317e-10
Gm26814	60.2608	-1.58972	0.265264	-5.993	2.06007e-09	4.23438e-08
Ly6g6e	65.3922	-1.58818	0.223272	-7.11322	1.13368e-12	3.68501e-11
Gm43982	30.5089	-1.57946	0.288736	-5.47025	4.49391e-08	7.31368e-07
Gm43707	52.9911	-1.57575	0.27597	-5.70987	1.13064e-08	2.03216e-07
Ephx1	212.326	-1.56882	0.147334	-10.648	1.78068e-26	1.70608e-24
Zbtb20	100.009	-1.56736	0.208932	-7.50176	6.29666e-14	2.33045e-12
Txlnb	22.6528	-1.56621	0.285819	-5.47972	4.26005e-08	6.96649e-07
Gm47026	21.3666	-1.55717	0.295381	-5.27175	1.35132e-07	2.00035e-06
Wnt16	20.5413	-1.55689	0.29273	-5.3185	1.04627e-07	1.58044e-06
Srrm4os	19.4504	-1.5566	0.292766	-5.31687	1.05568e-07	1.59364e-06
Tgm2	106.923	-1.55152	0.201694	-7.69244	1.4435e-14	5.82326e-13
Ampd3	132.824	-1.5514	0.175032	-8.86355	7.75062e-19	4.66234e-17
Gm29488	65.1976	-1.54498	0.246586	-6.26546	3.71724e-10	8.57528e-09
Omg	21.2107	-1.53992	0.294507	-5.22882	1.70593e-07	2.47011e-06
Gm37137	24.5176	-1.52992	0.291807	-5.24293	1.58044e-07	2.31094e-06
Gm44704	13.8897	-1.52867	0.297985	-5.13001	2.89728e-07	4.00014e-06
Gm44434	48.9851	-1.52181	0.271192	-5.61157	2.00494e-08	3.46721e-07
Gata6	73.0099	-1.52153	0.212851	-7.14836	8.78176e-13	2.91429e-11
Grin1	24.3989	-1.52073	0.285744	-5.32201	1.02625e-07	1.55316e-06
Gm48600	118.489	-1.51583	0.216697	-6.99518	2.6491e-12	8.20667e-11
Gm4117	25.4787	-1.51127	0.288557	-5.23733	1.62916e-07	2.36962e-06
Sh3rf2	50.3616	-1.50825	0.24239	-6.2224	4.89598e-10	1.10373e-08
Lars2	7814.6	-1.50761	0.2977	-5.06418	4.10156e-07	5.52165e-06
AC120375,2	38.8492	-1.5073	0.273979	-5.50153	3.76518e-08	6.22145e-07
Gm45280	25.5945	-1.50136	0.288889	-5.197	2.02525e-07	2.89369e-06
Wnt3	82.5354	1.50101	0.210057	7.14575	8.95065e-13	2.9662e-11
Znf41-ps	29.0441	1.50195	0.277015	5.42192	5.89613e-08	9.38993e-07
Olfr913	9.49737	1.50584	0.291432	5.16703	2.37848e-07	3.35204e-06
Foxi3	39.3661	1.50706	0.263777	5.71338	1.10757e-08	1.99522e-07
Plxnc1	324.175	1.50744	0.134655	11.1948	4.32185e-29	4.68911e-27
Grhl2	645.729	1.50855	0.0995803	15.1491	7.68597e-52	2.64676e-49
Nat8f2	10.6255	1.51062	0.293643	5.14439	2.68386e-07	3.73703e-06
Raet1d	40.7357	1.51098	0.256132	5.89924	3.65185e-09	7.21893e-08
Clu	364.618	1.52191	0.12763	11.9244	8.8331e-33	1.20623e-30
Gpx1	5587.89	1.52731	0.0762079	20.0414	2.39895e-89	2.71436e-86
Gm8935	2076.46	1.53107	0.0739257	20.7109	2.76122e-95	4.37395e-92
Gm13241	77.0363	1.53149	0.213983	7.15704	8.24351e-13	2.74333e-11
Tesc	84.6605	1.53473	0.210286	7.29832	2.91392e-13	1.0182e-11
Diras2	16.835	1.54324	0.297232	5.19206	2.07982e-07	2.96809e-06
Gm38391	113.351	1.54445	0.204668	7.54611	4.48439e-14	1.71584e-12
Gm4779	84.0686	1.54581	0.210512	7.34306	2.08758e-13	7.42561e-12
Gc	23.0847	1.54701	0.287085	5.38867	7.09802e-08	1.10667e-06
Hivep2	183.765	1.55176	0.161733	9.59459	8.42503e-22	6.10327e-20
Dpy19l2	14.5737	1.55895	0.298123	5.22922	1.70227e-07	2.46631e-06
Gm37416	19.7356	1.56546	0.294986	5.30689	1.11509e-07	1.67587e-06
Col6a5	47.1394	1.57321	0.254392	6.18418	6.24257e-10	1.38618e-08
Hist1h2aa	185.456	1.58695	0.160042	9.9159	3.55056e-23	2.69537e-21
Slc25a31	53.4283	1.58923	0.247155	6.43008	1.27534e-10	3.13051e-09
Cd209d	19.4553	1.5935	0.29369	5.42579	5.77e-08	9.19524e-07
Nlrp4c	14.8102	1.60083	0.298144	5.36932	7.90323e-08	1.21941e-06
Arl4c	222.716	1.60422	0.148369	10.8124	3.00769e-27	2.97774e-25
Sned1	404.212	1.60529	0.137506	11.6743	1.72421e-31	2.16766e-29
Zfp985	1645.97	1.60549	0.107465	14.9397	1.81827e-50	6.08506e-48
Gadd45g	64.4237	1.61401	0.225994	7.14182	9.21019e-13	3.03949e-11
Cdkn1c	3487.31	1.61729	0.0833344	19.4073	6.69923e-84	6.63252e-81
Glyatl3	39.6255	1.61746	0.258452	6.25825	3.8933e-10	8.93804e-09
Zfp992	107.865	1.61823	0.203497	7.95208	1.83413e-15	8.1156e-14
1700097N02Rik	62.5175	1.6188	0.235351	6.87823	6.06026e-12	1.79102e-10
2410141K09Rik	631.791	1.61955	0.103366	15.6681	2.50026e-55	1.04226e-52
Gm13245	37.0777	1.6223	0.26483	6.12584	9.02079e-10	1.96105e-08
Podxl	882.364	1.62769	0.0904219	18.0011	1.91002e-72	1.26067e-69
Mtus2	95.1855	1.64089	0.202851	8.08911	6.01023e-16	2.83915e-14
Insm1	191.613	1.64176	0.156849	10.4672	1.22268e-25	1.08809e-23
Gm40849	38.1646	1.6453	0.266622	6.17092	6.78949e-10	1.49652e-08
Fthl17f	11.3739	1.64834	0.296137	5.56614	2.60449e-08	4.42038e-07
Enpp2	41.4545	1.64864	0.260686	6.32423	2.54495e-10	5.99311e-09
Kcnk2	16.1494	1.65184	0.298134	5.54058	3.01465e-08	5.04799e-07
Clca3b	101.289	1.66091	0.196484	8.45318	2.8347e-17	1.49678e-15
Gm37352	1040.94	1.66574	0.117551	14.1704	1.39665e-45	3.56838e-43
Nt5e	123.378	1.67159	0.180765	9.24731	2.30218e-20	1.49869e-18
Tex19,1	1096.39	1.67585	0.089207	18.786	9.825e-79	7.78172e-76
Nlrp9b	46.8834	1.67726	0.253603	6.6137	3.74831e-11	9.88497e-10
Pnma5	26.2672	1.6826	0.28285	5.94872	2.70251e-09	5.42809e-08
Gm19792	31.6373	1.68292	0.276269	6.09158	1.11801e-09	2.3954e-08
Gm44732	1310.55	1.6886	0.0929654	18.1638	9.99302e-74	6.78412e-71
Esam	474.837	1.69525	0.112712	15.0406	3.98178e-51	1.35159e-48
Pcdh9	38.5517	1.6983	0.261643	6.4909	8.53224e-11	2.1363e-09
Gm13284	12.4848	1.70006	0.296508	5.7336	9.83237e-09	1.78477e-07
Gm30735	11.1354	1.70063	0.29531	5.7588	8.47145e-09	1.55677e-07
Adm	32.6594	1.70153	0.278287	6.11428	9.69917e-10	2.09702e-08
Cd59a	75.336	1.70275	0.217292	7.83623	4.64265e-15	1.9594e-13
Cd200	20.1564	1.7064	0.292967	5.82455	5.72658e-09	1.08681e-07
Gstp-ps	1894.4	1.70646	0.107619	15.8565	1.26686e-56	5.67958e-54
Pilrb1	12.1417	1.71076	0.295112	5.797	6.75111e-09	1.26509e-07
Gm30692	40.8742	1.71326	0.263647	6.4983	8.12304e-11	2.04678e-09
Naprt	532.01	1.71966	0.110153	15.6116	6.06788e-55	2.40298e-52
Egr3	19.1196	1.73051	0.295105	5.86405	4.51719e-09	8.74047e-08
Pilra	159.345	1.74462	0.170791	10.2149	1.69973e-24	1.41214e-22
Dll1	108.123	1.75059	0.192804	9.07961	1.08967e-19	6.7779e-18
Atf3	292.539	1.75287	0.13729	12.7676	2.48576e-37	4.40778e-35
Akr1b8	264.159	1.75464	0.139214	12.6039	2.01081e-36	3.25027e-34
Ankrd33b	459.804	1.75999	0.120644	14.5883	3.33278e-48	9.89877e-46
Cd22	19.4482	1.76111	0.29465	5.97696	2.27333e-09	4.64061e-08
CN725425	173.469	1.7636	0.160305	11.0015	3.758e-28	3.9164e-26
Myo5b	159.619	1.764	0.170985	10.3167	5.92006e-25	5.0238e-23
Jcad	797.238	1.76469	0.0936674	18.8399	3.55383e-79	2.91181e-76
Tex16	28.768	1.76516	0.279739	6.31001	2.79018e-10	6.54467e-09
Zfp773	93.1387	1.76724	0.206259	8.56807	1.05233e-17	5.77468e-16
Grm6	17.4556	1.76959	0.297269	5.95283	2.63542e-09	5.31581e-08
Dcdc2a	32.0468	1.77046	0.281376	6.29216	3.13082e-10	7.29327e-09
AC166344,3	29.0549	1.7753	0.285908	6.20934	5.32063e-10	1.19268e-08
Cox7b2	29.2333	1.78122	0.280302	6.35465	2.08901e-10	4.99366e-09
Gm13147	226.912	1.78126	0.169771	10.4921	9.3891e-26	8.54768e-24
Pcdhb17	36.2053	1.78333	0.273436	6.52193	6.94086e-11	1.77145e-09
Zcwpw1	479.599	1.79235	0.117227	15.2896	8.97628e-53	3.28131e-50
Nuggc	67.3624	1.79291	0.224824	7.9747	1.52745e-15	6.82214e-14
L3hypdh	175.257	1.79459	0.161861	11.0872	1.44738e-28	1.5285e-26
Samd9l	257.688	1.79614	0.144445	12.4348	1.69193e-35	2.62757e-33
Gm44779	12.3417	1.81442	0.296703	6.11528	9.6388e-10	2.08776e-08
Pcdh8	37.4594	1.81485	0.265472	6.83633	8.12464e-12	2.36002e-10
S100a6	734.772	1.81641	0.0956603	18.9881	2.13838e-80	1.81464e-77
Tex101	17.3791	1.82366	0.297511	6.12972	8.80322e-10	1.91551e-08
Fosb	134.176	1.83356	0.192712	9.51453	1.82534e-21	1.287e-19
Alox15	22.2466	1.83564	0.293211	6.26048	3.83796e-10	8.82804e-09
Gm37867	12.7496	1.83739	0.29688	6.18899	6.05516e-10	1.34842e-08
Rassf9	35.6946	1.84077	0.2698	6.82272	8.93338e-12	2.57604e-10
Vrtn	172.848	1.84298	0.161987	11.3773	5.42239e-30	6.31575e-28
Hist1h2ba	135.044	1.8466	0.184821	9.99132	1.66354e-23	1.29598e-21
Tmem54	43.2778	1.85105	0.260579	7.10359	1.21559e-12	3.93511e-11
Gm16233	91.6022	1.86132	0.215714	8.62865	6.20823e-18	3.4791e-16
Zfp534	626.183	1.87619	0.120494	15.5708	1.14878e-54	4.47478e-52
Adamts1	208.388	1.8882	0.153525	12.299	9.17403e-35	1.3624e-32
Klk1b3	14.2612	1.88846	0.297933	6.33853	2.31975e-10	5.50095e-09
Ube2dnl1	33.2982	1.88871	0.278134	6.79064	1.11637e-11	3.1844e-10
Myrip	38.448	1.89033	0.265176	7.12857	1.01414e-12	3.32371e-11
Fam159b	55.9145	1.89096	0.263565	7.17453	7.25574e-13	2.43572e-11
C78283	33.4189	1.89416	0.274566	6.89874	5.2465e-12	1.56611e-10
Gm6639	40.7805	1.89728	0.263309	7.20553	5.78173e-13	1.95977e-11
Mmp25	95.0152	1.90188	0.220174	8.63804	5.71852e-18	3.21224e-16
Ldoc1	62.5978	1.90331	0.238017	7.99653	1.27971e-15	5.78086e-14
Gm44911	120.711	1.91475	0.192319	9.95613	2.37124e-23	1.8234e-21
AI481877	76.8284	1.92777	0.222623	8.65938	4.7435e-18	2.67086e-16
Nckap1l	122.422	1.93008	0.185097	10.4274	1.85827e-25	1.62931e-23
Ccno	32.3389	1.93259	0.276061	7.00061	2.54856e-12	7.90552e-11
Slc5a5	147.98	1.94278	0.192141	10.1112	4.92619e-24	3.99492e-22
Clca4a	80.6949	1.94285	0.226215	8.58847	8.8133e-18	4.88142e-16
1700030C10Rik	798.353	1.94618	0.098624	19.7333	1.11606e-86	1.20539e-83
Gm12260	981.292	1.95413	0.0995765	19.6244	9.57116e-86	9.88784e-83
Pilrb2	14.8627	1.95653	0.297628	6.57375	4.90646e-11	1.27972e-09
Prr19	91.1033	1.96013	0.209791	9.34325	9.34237e-21	6.27073e-19
8030474K03Rik	85.0595	1.96264	0.211593	9.27552	1.76748e-20	1.15695e-18
Gm6673	48.9384	1.96461	0.250772	7.83422	4.71747e-15	1.98744e-13
Gm21411	312.318	1.96548	0.145475	13.5108	1.35032e-41	2.7423e-39
Rasef	51.7434	1.97977	0.249732	7.92759	2.23445e-15	9.81384e-14
Gm11331	15.8372	1.98522	0.298132	6.65887	2.7594e-11	7.44225e-10
Gm43352	116.385	1.99724	0.193403	10.3268	5.32897e-25	4.53841e-23
Olfr914	18.6827	2.01174	0.29772	6.75714	1.40742e-11	3.93894e-10
Fgfbp1	415.853	2.01175	0.122638	16.404	1.7915e-60	8.68732e-58
Lef1	377.258	2.03188	0.12163	16.7055	1.19601e-62	6.31519e-60
C130073F10Rik	23.7692	2.03937	0.292661	6.96835	3.20669e-12	9.83151e-11
Lncenc1	196.325	2.05493	0.157588	13.0399	7.25497e-39	1.35736e-36
AC167192,1	202.535	2.05767	0.155574	13.2263	6.18244e-40	1.22417e-37
Tmem229a	263.811	2.06156	0.147314	13.9944	1.68747e-44	3.85539e-42
AU022751	43.7598	2.06883	0.261943	7.89801	2.83401e-15	1.23106e-13
Olfr510	15.4951	2.07	0.298106	6.94383	3.81603e-12	1.1536e-10
Gm21321	17.617	2.07601	0.297736	6.97266	3.11009e-12	9.58479e-11
4933427I04Rik	16.143	2.07643	0.298093	6.96572	3.26722e-12	9.9913e-11
Colec12	1154.7	2.08657	0.0930002	22.4362	1.74505e-111	3.45535e-108
T	35.1482	2.0868	0.274098	7.61332	2.67135e-14	1.04398e-12
E030030I06Rik	123.191	2.08834	0.192151	10.8682	1.63331e-27	1.63064e-25
Slc35f1	104.128	2.09179	0.199948	10.4617	1.29566e-25	1.14874e-23
Gsx1	111.305	2.09956	0.201125	10.4391	1.64417e-25	1.44693e-23
Gm16685	32.02	2.13044	0.279736	7.6159	2.61858e-14	1.02504e-12
Zfp980	334.306	2.14374	0.155336	13.8007	2.52481e-43	5.50385e-41
Fpr3	20.8576	2.15534	0.296791	7.26212	3.81066e-13	1.3199e-11
Tmem181b-ps	142.597	2.16696	0.181158	11.9617	5.63828e-33	7.744e-31
Gm17771	212.979	2.17559	0.159241	13.6623	1.70534e-42	3.6179e-40
Bglap3	68.1586	2.17668	0.233121	9.33714	9.89755e-21	6.60606e-19
Zfp640	118.435	2.18933	0.194408	11.2615	2.03291e-29	2.26779e-27
Gm16505	32.7188	2.21006	0.27921	7.9154	2.46459e-15	1.07847e-13
Gm10769	91.127	2.22258	0.219249	10.1372	3.77696e-24	3.084e-22
Dnmt3l	1041.33	2.23062	0.0996607	22.3822	5.87097e-111	1.07308e-107
Crlf1	280.49	2.24747	0.143554	15.6559	3.02889e-55	1.24085e-52
Gcm1	36.0144	2.25581	0.274856	8.20726	2.26295e-16	1.10411e-14
Taf7l	122.78	2.26348	0.192661	11.7485	7.18739e-32	9.28149e-30
Tnfrsf23	32.1187	2.27268	0.281486	8.07385	6.81131e-16	3.19849e-14
Mael	166.585	2.2727	0.178052	12.7643	2.59631e-37	4.56969e-35
Arntl2	425.521	2.29061	0.133312	17.1824	3.59794e-66	2.08514e-63
Vstm5	82.8127	2.2973	0.221892	10.3533	4.04488e-25	3.46969e-23
Car3	149.296	2.29965	0.183614	12.5244	5.49143e-36	8.69879e-34
C430049E01Rik	112.801	2.30006	0.201196	11.4319	2.89622e-30	3.40678e-28
Rex2	91.6063	2.31566	0.222461	10.4093	2.24906e-25	1.95037e-23
Vmn1r43	23.2323	2.32204	0.295059	7.86974	3.55389e-15	1.52151e-13
H60b	102.623	2.32439	0.206629	11.2491	2.33861e-29	2.58454e-27
Olfr1372-ps1	198.136	2.34086	0.164522	14.2282	6.11994e-46	1.61573e-43
Car2	6830.46	2.36636	0.0853909	27.7121	4.99647e-169	2.96803e-165
Soga3	1044.07	2.37396	0.0960461	24.7169	7.04257e-135	1.85932e-131
Skor1	50.0292	2.40969	0.25867	9.31568	1.21176e-20	7.99796e-19
Olfr416-ps1	22.2046	2.46233	0.296988	8.29103	1.12272e-16	5.6162e-15
Stk31	366.077	2.47474	0.133236	18.5741	5.2041e-77	3.74711e-74
Gm36551	21.6157	2.47501	0.296755	8.34024	7.41386e-17	3.76412e-15
Zfp600	121.324	2.55793	0.210506	12.1513	5.64433e-34	8.03083e-32
Zfp986	152.264	2.56697	0.187408	13.6972	1.05443e-42	2.25715e-40
Mroh6	189.417	2.60342	0.176611	14.741	3.51434e-49	1.11339e-46
Usp26	60.1338	2.60808	0.250893	10.3952	2.60711e-25	2.24448e-23
Akr1c21	30.0417	2.60853	0.289675	9.00501	2.15642e-19	1.32743e-17
Zfp981	542.192	2.61094	0.14149	18.4532	4.9173e-76	3.43647e-73
9330159F19Rik	176.339	2.66504	0.196557	13.5586	7.04849e-42	1.44379e-39
Gm21060	142.915	2.67151	0.193067	13.8372	1.51985e-43	3.37507e-41
Enpp3	956.249	2.67233	0.10066	26.548	2.70595e-155	1.0716e-151
Gm13223	58.6287	2.6951	0.255534	10.5469	5.24955e-26	4.85348e-24
Cdx2	102.719	2.69692	0.214233	12.5887	2.43537e-36	3.90992e-34
Gabrr1	33.969	2.72819	0.285574	9.55334	1.25576e-21	8.96038e-20
Klk1b24	27.3265	2.77805	0.293727	9.45792	3.1413e-21	2.18887e-19
Sytl2	74.8569	2.80073	0.240199	11.66	2.03997e-31	2.55114e-29
Zfp978	777.02	2.80886	0.118504	23.7027	3.37854e-124	7.29795e-121
Mmp9	222.228	2.88321	0.163673	17.6156	1.86849e-69	1.16835e-66
Rpl39l	139.13	2.89075	0.207415	13.937	3.77279e-44	8.53765e-42
Serpina3m	121.972	2.9175	0.206963	14.0968	3.97649e-45	9.64136e-43
AC156790,4	41.4917	2.95593	0.282117	10.4777	1.09384e-25	9.7965e-24
BC051019	82.6226	2.9642	0.234476	12.6418	1.24229e-36	2.03573e-34
Samd5	90.3538	2.9975	0.230261	13.0178	9.68969e-39	1.79872e-36
Olfr417	42.0764	3.00244	0.283948	10.5739	3.93707e-26	3.68302e-24
Gm6410	36.6552	3.00801	0.286872	10.4855	1.00664e-25	9.12926e-24
Shisa6	95.2373	3.04743	0.227734	13.3815	7.75174e-41	1.54781e-38
Gm19368	71.1386	3.06913	0.249092	12.3213	6.95872e-35	1.04649e-32
Platr16	98.8364	3.07748	0.226118	13.61	3.49053e-42	7.33969e-40
Cthrc1	230.893	3.09423	0.176531	17.528	8.76472e-69	5.33996e-66
Gm4969	176.038	3.16061	0.19208	16.4547	7.76232e-61	3.84251e-58
Speer4cos	39.3742	3.17631	0.288862	10.996	3.99679e-28	4.14706e-26
Pcdh17	161.359	3.31109	0.195635	16.9248	2.95266e-64	1.5945e-61
Vmn1r219	130.419	3.37716	0.218648	15.4456	8.07324e-54	2.99732e-51
Colgalt2	84.8122	3.38886	0.245831	13.7853	3.12308e-43	6.74614e-41
Gm5522	53.9147	3.41035	0.278358	12.2517	1.64576e-34	2.38445e-32
Gm13230	1241.36	3.44018	0.108319	31.7597	2.33413e-221	5.54613e-217
Gm1110	48.3205	3.49179	0.283311	12.3249	6.65184e-35	1.00672e-32
AC101831,1	56.0323	3.49686	0.276158	12.6625	9.5376e-37	1.57377e-34
Gm13193	56.9903	3.65391	0.277879	13.1493	1.71794e-39	3.3187e-37
Asb4	78.9525	3.66689	0.258091	14.2078	8.20185e-46	2.13515e-43
Clec2f	69.3983	3.82322	0.272765	14.0165	1.23479e-44	2.93398e-42
Gm4316	88.8302	3.83865	0.258156	14.8695	5.19901e-50	1.69224e-47
Gm37697	72.1796	3.84698	0.269317	14.2842	2.74542e-46	7.41295e-44
Tex13b	102.481	3.86126	0.245407	15.7341	8.83384e-56	3.74823e-53
Cyp2b23	824.227	4.12192	0.132953	31.0028	4.94482e-211	5.87469e-207
Platr5	204.02	4.33874	0.212495	20.4181	1.15546e-92	1.615e-89
Mep1b	351.59	4.46258	0.178509	24.9992	6.23501e-138	1.85188e-134
Mmp12	177.877	4.94485	0.24433	20.2384	4.49404e-91	5.62016e-88
Cd84	186.614	5.08397	0.247584	20.5343	1.06243e-93	1.57778e-90
CT010465,1	487.737	5.56785	0.197597	28.1778	1.09549e-174	8.67666e-171
2010005H15Rik	454.355	6.20623	0.231973	26.7541	1.10518e-157	5.25203e-154

## Sheet: logFC1
Table 1: List of RNAs differentially abundant in KO+NLS compared to KO+WT cells (log2FC more than 1.5, p <0.01, see Material and Methods). Numbers refers to TPM values for each sample. In the logFC1 tab, genes names in bold refers to genes that are also Trim71 targets and belong to the ontology “multicellular organismal reproductive process” in a ToppGene analysis (toppgene.cchmc.org).
Gene_ID	baseMean	log2FoldChange	lfcSE	stat	pvalue	padj
Rian	213.287	-4.49157	0.210817	-21.3056	1.00727e-100	1.70956e-97
Cubn	224.449	-3.65849	0.182008	-20.1007	7.27543e-90	8.64357e-87
Meg3	63.84	-3.11095	0.269533	-11.542	8.10342e-31	9.92502e-29
Srgn	38.543	-2.58003	0.273568	-9.43104	4.06049e-21	2.79656e-19
Mirg	32.4334	-2.22047	0.279462	-7.94553	1.93357e-15	8.5397e-14
Pdgfra	79.008	-2.21833	0.217771	-10.1865	2.27763e-24	1.87262e-22
Gm37899	19.4748	-2.21248	0.297972	-7.42512	1.12674e-13	4.08115e-12
Col23a1	110.612	-2.13636	0.235748	-9.06206	1.28013e-19	7.94183e-18
Zfp521	85.7803	-2.05134	0.207684	-9.87722	5.22649e-23	3.90524e-21
Gm38162	67.1038	-2.03292	0.257551	-7.89327	2.94376e-15	1.27407e-13
Gm38387	50.0371	-2.01982	0.267746	-7.54379	4.56497e-14	1.73549e-12
AL591892,1	48.7984	-2.01819	0.267686	-7.5394	4.72143e-14	1.78356e-12
Col4a2	319.727	-1.98965	0.135073	-14.7302	4.12245e-49	1.28886e-46
Gm37570	66.8536	-1.91722	0.265596	-7.21856	5.25422e-13	1.79153e-11
Gm12002	47.3211	-1.90391	0.259332	-7.34158	2.11081e-13	7.49702e-12
Gm38001	48.4866	-1.90044	0.271064	-7.01104	2.36549e-12	7.38586e-11
Fgf1	119.125	-1.88667	0.184886	-10.2045	1.89247e-24	1.56679e-22
Gm15533	23.2672	-1.87205	0.294004	-6.36742	1.9223e-10	4.62305e-09
H19	28.814	-1.85211	0.2794	-6.62887	3.38274e-11	8.99075e-10
P2ry14	36.4648	-1.83807	0.276912	-6.63775	3.18512e-11	8.54194e-10
Dixdc1	184.82	-1.82314	0.159836	-11.4063	3.88898e-30	4.55202e-28
Gm43019	41.138	-1.82266	0.281416	-6.47674	9.37237e-11	2.3368e-09
Cobl	2195.43	-1.80989	0.0703106	-25.7414	4.02382e-146	1.36586e-142
Gm48889	34.1884	-1.80649	0.283173	-6.37948	1.77686e-10	4.29065e-09
Gm37621	35.4915	-1.79627	0.280901	-6.39466	1.60905e-10	3.90527e-09
Aspn	65.7822	-1.79289	0.2639	-6.79381	1.09211e-11	3.12646e-10
Gm43164	42.5437	-1.78216	0.266944	-6.67617	2.45268e-11	6.66797e-10
Col4a1	877.979	-1.78161	0.0956781	-18.6209	2.1746e-77	1.61471e-74
Dglucy	21.06	-1.77761	0.290842	-6.11196	9.84157e-10	2.12394e-08
Kit	560.245	-1.77334	0.114683	-15.463	6.16498e-54	2.32518e-51
4930517O19Rik	63.9516	-1.77301	0.24744	-7.16541	7.75558e-13	2.59185e-11
Ly75	447.431	-1.76333	0.112927	-15.6148	5.77184e-55	2.32449e-52
Lrrc31	28.411	-1.74873	0.279758	-6.25088	4.08155e-10	9.34313e-09
Gm37204	70.9917	-1.73891	0.263719	-6.5938	4.28696e-11	1.12307e-09
Lrrc34	765.602	-1.73116	0.103829	-16.6732	2.05281e-62	1.06037e-59
Dab2	83.1553	-1.7238	0.208018	-8.28677	1.16363e-16	5.79644e-15
C79798	28.5994	-1.71635	0.289355	-5.93164	2.99924e-09	5.98864e-08
Mipol1	258.513	-1.70919	0.13447	-12.7106	5.16409e-37	8.70241e-35
Gm47479	22.7775	-1.70131	0.295265	-5.76199	8.31259e-09	1.53113e-07
Gm43168	31.7688	-1.69991	0.28648	-5.93379	2.96024e-09	5.91576e-08
Fxyd4	53.7932	-1.69802	0.256372	-6.62327	3.51341e-11	9.31721e-10
Igsf21	210.436	-1.68918	0.154169	-10.9567	6.17127e-28	6.29337e-26
Gm15564	725.521	-1.67693	0.296829	-5.6495	1.60919e-08	2.82393e-07
Fut9	1541.18	-1.67457	0.107613	-15.561	1.33932e-54	5.13283e-52
Gm47342	17.7584	-1.6686	0.29815	-5.59652	2.18693e-08	3.74378e-07
Gm37274	59.5371	-1.66239	0.257071	-6.46667	1.00186e-10	2.48487e-09
Bcas3os1	21.2241	-1.65063	0.29626	-5.57157	2.52453e-08	4.2908e-07
Gm43984	33.6879	-1.63996	0.285319	-5.74781	9.04068e-09	1.65497e-07
Gm38009	43.9319	-1.6284	0.269255	-6.04778	1.46859e-09	3.09353e-08
Sfrp1	1798.3	-1.60546	0.0834823	-19.2311	2.03139e-82	1.93072e-79
Gm26690	113.131	-1.60336	0.234732	-6.83061	8.45563e-12	2.45317e-10
Gm26814	60.2608	-1.58972	0.265264	-5.993	2.06007e-09	4.23438e-08
Ly6g6e	65.3922	-1.58818	0.223272	-7.11322	1.13368e-12	3.68501e-11
Gm43982	30.5089	-1.57946	0.288736	-5.47025	4.49391e-08	7.31368e-07
Gm43707	52.9911	-1.57575	0.27597	-5.70987	1.13064e-08	2.03216e-07
Ephx1	212.326	-1.56882	0.147334	-10.648	1.78068e-26	1.70608e-24
Zbtb20	100.009	-1.56736	0.208932	-7.50176	6.29666e-14	2.33045e-12
Txlnb	22.6528	-1.56621	0.285819	-5.47972	4.26005e-08	6.96649e-07
Gm47026	21.3666	-1.55717	0.295381	-5.27175	1.35132e-07	2.00035e-06
Wnt16	20.5413	-1.55689	0.29273	-5.3185	1.04627e-07	1.58044e-06
Srrm4os	19.4504	-1.5566	0.292766	-5.31687	1.05568e-07	1.59364e-06
Tgm2	106.923	-1.55152	0.201694	-7.69244	1.4435e-14	5.82326e-13
Ampd3	132.824	-1.5514	0.175032	-8.86355	7.75062e-19	4.66234e-17
Gm29488	65.1976	-1.54498	0.246586	-6.26546	3.71724e-10	8.57528e-09
Omg	21.2107	-1.53992	0.294507	-5.22882	1.70593e-07	2.47011e-06
Gm37137	24.5176	-1.52992	0.291807	-5.24293	1.58044e-07	2.31094e-06
Gm44704	13.8897	-1.52867	0.297985	-5.13001	2.89728e-07	4.00014e-06
Gm44434	48.9851	-1.52181	0.271192	-5.61157	2.00494e-08	3.46721e-07
Gata6	73.0099	-1.52153	0.212851	-7.14836	8.78176e-13	2.91429e-11
Grin1	24.3989	-1.52073	0.285744	-5.32201	1.02625e-07	1.55316e-06
Gm48600	118.489	-1.51583	0.216697	-6.99518	2.6491e-12	8.20667e-11
Gm4117	25.4787	-1.51127	0.288557	-5.23733	1.62916e-07	2.36962e-06
Sh3rf2	50.3616	-1.50825	0.24239	-6.2224	4.89598e-10	1.10373e-08
Lars2	7814.6	-1.50761	0.2977	-5.06418	4.10156e-07	5.52165e-06
AC120375,2	38.8492	-1.5073	0.273979	-5.50153	3.76518e-08	6.22145e-07
Gm45280	25.5945	-1.50136	0.288889	-5.197	2.02525e-07	2.89369e-06
Atp6v0a4	37.7382	-1.49416	0.258176	-5.78736	7.15015e-09	1.3346e-07
Gata4	52.2495	-1.48433	0.236318	-6.28107	3.36258e-10	7.80257e-09
Gm47024	62.3258	-1.47552	0.256768	-5.74651	9.11028e-09	1.66387e-07
Gm26945	11.6095	-1.47479	0.295192	-4.99603	5.85231e-07	7.69119e-06
Gpc6	62.1126	-1.47091	0.245001	-6.0037	1.92869e-09	3.98154e-08
Bmp7	99.3022	-1.46648	0.196704	-7.45527	8.96859e-14	3.26344e-12
Dsg2	1317.24	-1.4647	0.0823201	-17.7927	8.04703e-71	5.16771e-68
Abcg1	289.613	-1.4632	0.134572	-10.873	1.55039e-27	1.55438e-25
Gm37669	32.9722	-1.44999	0.280165	-5.17549	2.27308e-07	3.22067e-06
Ncam1	252.095	-1.44519	0.134016	-10.7837	4.11162e-27	4.05378e-25
Egln3	395.465	-1.4422	0.128899	-11.1887	4.63367e-29	4.98193e-27
5330426L24Rik	14.5638	-1.44034	0.296491	-4.85796	1.18603e-06	1.43666e-05
Gm45294	39.3267	-1.43625	0.278505	-5.15699	2.5095e-07	3.52621e-06
Rtl1	30.7379	-1.43453	0.275529	-5.20647	1.9247e-07	2.76164e-06
Sh3pxd2a	648.288	-1.43394	0.100648	-14.247	4.68063e-46	1.24962e-43
March1	59.4385	-1.43192	0.242566	-5.90323	3.56455e-09	7.05223e-08
Flg	155.076	-1.42979	0.195627	-7.30872	2.69696e-13	9.47967e-12
Trpc5	41.7873	-1.4272	0.266174	-5.3619	8.23498e-08	1.2673e-06
Gm26783	28.2281	-1.42671	0.287603	-4.96069	7.02414e-07	9.02654e-06
Hesx1	14.0903	-1.4252	0.298142	-4.78028	1.75051e-06	2.01911e-05
Gjb3	671.481	-1.42448	0.113806	-12.5168	6.04432e-36	9.51119e-34
Olfr91	17.7617	-1.42281	0.297291	-4.7859	1.70223e-06	1.97109e-05
Gm42996	15.5759	-1.41947	0.298152	-4.76088	1.92748e-06	2.19134e-05
Abat	127.311	-1.41774	0.177333	-7.99483	1.29756e-15	5.85032e-14
Gm48890	22.9677	-1.41759	0.292287	-4.84998	1.23472e-06	1.48548e-05
Osbpl6	125.1	-1.41549	0.175357	-8.07209	6.91051e-16	3.22595e-14
Gm37747	22.6352	-1.41251	0.293667	-4.8099	1.51003e-06	1.77349e-05
Trps1	1215.17	-1.40941	0.114662	-12.2919	1.00143e-34	1.47795e-32
Gm37195	19.1449	-1.40808	0.29606	-4.75606	1.97405e-06	2.23999e-05
Gm45804	69.6337	-1.40725	0.260288	-5.40651	6.42657e-08	1.01328e-06
C130075A20Rik	17.1585	-1.40458	0.297799	-4.71655	2.39882e-06	2.67347e-05
Gm11365	19.8287	-1.40365	0.294349	-4.76867	1.85443e-06	2.12454e-05
Dlgap1	48.2336	-1.3974	0.246425	-5.67068	1.42228e-08	2.52012e-07
A430090L17Rik	26.6057	-1.39212	0.291678	-4.77279	1.81689e-06	2.09054e-05
Gm43188	30.2076	-1.38015	0.282672	-4.88253	1.04735e-06	1.28611e-05
Gm37663	38.0759	-1.37839	0.277611	-4.96521	6.86285e-07	8.8336e-06
Gm43275	42.084	-1.37312	0.283005	-4.85194	1.22261e-06	1.47539e-05
Gm45532	45.6264	-1.37121	0.272493	-5.0321	4.85138e-07	6.46515e-06
Gm19667	28.714	-1.36772	0.284412	-4.80894	1.51733e-06	1.77952e-05
Sorl1	871.785	-1.36493	0.090013	-15.1637	6.14753e-52	2.18017e-49
Gm26906	9.05044	-1.3645	0.290322	-4.69993	2.60245e-06	2.87346e-05
Fam81a	371.138	-1.36434	0.131114	-10.4057	2.33439e-25	2.01699e-23
Samd12	48.6066	-1.36323	0.251696	-5.41619	6.08838e-08	9.65425e-07
Apln	24.4137	-1.36244	0.284928	-4.78169	1.73827e-06	2.00792e-05
Dnajc6	1120.57	-1.35867	0.0846018	-16.0596	4.89804e-58	2.28201e-55
Acvrl1	35.9221	-1.3528	0.263975	-5.12473	2.97958e-07	4.10184e-06
Cux2	93.6882	-1.34621	0.195502	-6.88592	5.74143e-12	1.70102e-10
Gm47206	14.635	-1.34616	0.298107	-4.51568	6.31149e-06	6.40886e-05
Vwf	51.2607	-1.34579	0.235934	-5.70409	1.16966e-08	2.09594e-07
Gm27000	8.08745	-1.34577	0.287103	-4.68742	2.76674e-06	3.03372e-05
Gm37738	106.472	-1.34461	0.217506	-6.18196	6.33116e-10	1.402e-08
Gm37879	34.3823	-1.34017	0.278161	-4.81797	1.45024e-06	1.71353e-05
Xaf1	17.3627	-1.33969	0.293929	-4.55785	5.16787e-06	5.33886e-05
Gm47503	23.7192	-1.33963	0.295169	-4.53852	5.66502e-06	5.82209e-05
Gm5514	157.202	-1.33879	0.164245	-8.15119	3.60354e-16	1.72628e-14
Pirt	27.7375	-1.33544	0.274498	-4.86504	1.14434e-06	1.39296e-05
Lrriq4	103.502	-1.33293	0.201064	-6.62939	3.3707e-11	8.96877e-10
Gjb5	151.943	-1.3329	0.167047	-7.97922	1.47262e-15	6.60207e-14
Tmem117	23.0739	-1.33179	0.286686	-4.64545	3.39332e-06	3.66161e-05
Tbc1d12	241.622	-1.3299	0.134256	-9.90569	3.93256e-23	2.97585e-21
A4galt	121.298	-1.32886	0.181295	-7.32981	2.30472e-13	8.13705e-12
Eva1a	32.774	-1.32281	0.269743	-4.90398	9.39154e-07	1.16834e-05
Mvb12b	183.505	-1.32108	0.152151	-8.68269	3.8651e-18	2.18663e-16
St8sia1	18.8784	-1.32072	0.294703	-4.48152	7.41133e-06	7.39782e-05
Gm13854	32.6992	-1.32023	0.292559	-4.51268	6.40141e-06	6.47802e-05
Gm43260	18.5135	-1.31727	0.29812	-4.41859	9.93483e-06	9.6273e-05
Gm38235	29.9267	-1.31634	0.28686	-4.5888	4.45803e-06	4.67258e-05
Egflam	15.2331	-1.31405	0.298141	-4.4075	1.04572e-05	0.00010076
Kcnj13	49.4106	-1.31386	0.263164	-4.99255	5.95876e-07	7.80949e-06
Gabrp	14.3567	-1.31198	0.297329	-4.41255	1.02162e-05	9.87176e-05
Gm38359	161.851	-1.31088	0.291241	-4.50103	6.76263e-06	6.81165e-05
Gm28988	70.5154	-1.31013	0.24863	-5.2694	1.36869e-07	2.02374e-06
Gm11960	20.7461	-1.30726	0.295877	-4.41824	9.95089e-06	9.63893e-05
Gm26978	27.9307	-1.30636	0.287204	-4.54855	5.40167e-06	5.56347e-05
Gm48624	57.8099	-1.3039	0.262669	-4.96406	6.90337e-07	8.88094e-06
4930444E06Rik	15.4521	-1.30205	0.296533	-4.39092	1.12873e-05	0.00010797
Gm37868	28.2814	-1.30159	0.292812	-4.44513	8.78379e-06	8.60667e-05
Gm42993	51.8822	-1.29874	0.272771	-4.7613	1.92354e-06	2.1879e-05
Gm43593	49.9827	-1.29784	0.251033	-5.17001	2.34087e-07	3.30686e-06
Eppk1	902.255	-1.29753	0.100949	-12.8533	8.24132e-38	1.4835e-35
Gm43658	56.9047	-1.29737	0.251091	-5.16691	2.37991e-07	3.35204e-06
Gm15462	11.8944	-1.29705	0.297783	-4.35568	1.32653e-05	0.000125178
Lrrn3	16.4449	-1.29072	0.298089	-4.32998	1.4912e-05	0.000138354
Nol4l	135.599	-1.28724	0.176153	-7.30753	2.72098e-13	9.54995e-12
Gm43294	24.0452	-1.28295	0.288561	-4.44603	8.74737e-06	8.57806e-05
Tmem225	12.775	-1.28246	0.296102	-4.33114	1.48338e-05	0.000137736
Gm42992	34.3325	-1.28124	0.283046	-4.52662	5.99348e-06	6.12521e-05
Olfr983	11.3073	-1.27779	0.294346	-4.34111	1.41766e-05	0.000132514
Gm16090	83.2811	-1.27725	0.213259	-5.98918	2.109e-09	4.32746e-08
Gm26980	11.7493	-1.27641	0.296657	-4.30264	1.68776e-05	0.000154182
Gm37262	26.2914	-1.27523	0.284356	-4.48461	7.3046e-06	7.30799e-05
Slit2	110.734	-1.2752	0.185773	-6.86431	6.68117e-12	1.96232e-10
Gm43256	31.5153	-1.27469	0.288051	-4.42521	9.63463e-06	9.36696e-05
2700078F05Rik	415.275	-1.26946	0.28113	-4.51555	6.31515e-06	6.40984e-05
B3galt2	335.074	-1.2692	0.275011	-4.6151	3.92914e-06	4.16787e-05
Foxn4	81.5905	-1.26582	0.202778	-6.24241	4.30887e-10	9.83508e-09
Gm43465	20.0434	-1.26569	0.294158	-4.30275	1.68688e-05	0.000154161
2310030G06Rik	106.033	-1.26137	0.187484	-6.72788	1.72154e-11	4.77311e-10
Muc15	34.3582	-1.25806	0.277974	-4.52581	6.01639e-06	6.14598e-05
Add3	926.797	-1.2566	0.0887056	-14.1659	1.48905e-45	3.76397e-43
Aqp11	63.918	-1.25635	0.238118	-5.27618	1.31905e-07	1.96255e-06
Gm42701	13.6645	-1.25629	0.298036	-4.21523	2.49525e-05	0.000219917
Jakmip1	96.6557	-1.25619	0.191218	-6.56943	5.05092e-11	1.31451e-09
Gm45354	34.4596	-1.25533	0.281078	-4.46612	7.96506e-06	7.89231e-05
Gm43421	53.4856	-1.25402	0.262859	-4.77068	1.83602e-06	2.10866e-05
Srgap3	92.4082	-1.24709	0.200032	-6.23449	4.53261e-10	1.02963e-08
Gm43484	147.035	-1.24605	0.288458	-4.31971	1.56234e-05	0.000144222
Gm44456	23.9587	-1.24437	0.289995	-4.29102	1.77853e-05	0.000161914
Gm37023	25.6824	-1.2438	0.289389	-4.29804	1.72317e-05	0.000157055
Gm42648	45.0768	-1.24343	0.270032	-4.60477	4.12932e-06	4.35881e-05
Gm37625	23.514	-1.24303	0.289837	-4.28873	1.79699e-05	0.000163407
Gm37745	96.9181	-1.24258	0.22733	-5.46595	4.60425e-08	7.46768e-07
Evi2	8.47802	-1.24244	0.292208	-4.25189	2.11972e-05	0.000189633
Synpo	11.4591	-1.24011	0.297435	-4.16935	3.05466e-05	0.000262217
Kcnab1	67.3224	-1.23867	0.251064	-4.93367	8.06972e-07	1.01829e-05
Slco4c1	84.2953	-1.23861	0.203982	-6.07215	1.26211e-09	2.67759e-08
Nron	14.467	-1.23822	0.29764	-4.16012	3.18081e-05	0.000271868
Gm33280	23.4775	-1.23749	0.285092	-4.34068	1.42039e-05	0.000132692
Fabp3-ps1	1831.01	-1.23575	0.0862687	-14.3245	1.53871e-46	4.30134e-44
Gm43018	14.9967	-1.23491	0.29815	-4.14191	3.44423e-05	0.000291344
Gm38043	50.9874	-1.23172	0.249857	-4.92972	8.23489e-07	1.03474e-05
Cpe	319.426	-1.22933	0.133069	-9.23827	2.50526e-20	1.622e-18
Zc3h6	109.935	-1.22914	0.192461	-6.38645	1.69786e-10	4.11242e-09
Susd5	83.3347	-1.22894	0.208516	-5.89377	3.77484e-09	7.43114e-08
Gm43430	46.9945	-1.2289	0.265376	-4.63077	3.64311e-06	3.90103e-05
Olfr986	99.6967	-1.2288	0.221076	-5.5583	2.72417e-08	4.59396e-07
C030017G13Rik	67.1098	-1.22717	0.254407	-4.82366	1.40949e-06	1.67343e-05
Gm43259	22.4448	-1.22558	0.296784	-4.12953	3.63503e-05	0.000305469
Gm43176	35.748	-1.22487	0.27294	-4.4877	7.19962e-06	7.21511e-05
Ak4	741.378	-1.21788	0.0945493	-12.8809	5.76428e-38	1.05358e-35
Gm48442	9.69199	-1.21683	0.294603	-4.13042	3.62098e-05	0.000304452
Gm13571	24.9014	-1.21647	0.280449	-4.3376	1.4405e-05	0.000134279
Gm37940	65.9426	-1.21454	0.260484	-4.66263	3.1219e-06	3.3841e-05
Gm17976	44.541	-1.21384	0.263003	-4.61531	3.92513e-06	4.16547e-05
Ccdc170	23.7243	-1.20911	0.285058	-4.24163	2.21897e-05	0.00019762
Olfr1564	8.61596	-1.20738	0.290699	-4.15337	3.2762e-05	0.000279117
Elavl4	78.4248	-1.20723	0.205092	-5.88626	3.95022e-09	7.73793e-08
Sh2d2a	14.7909	-1.2055	0.29781	-4.04787	5.16856e-05	0.000417864
Gm48225	28.3385	-1.20407	0.289281	-4.16227	3.15093e-05	0.000269508
Gm26823	45.12	-1.20265	0.278638	-4.31617	1.58757e-05	0.000146187
Fxyd6	99.1093	-1.20218	0.186813	-6.43524	1.23276e-10	3.03226e-09
Gm43274	119.978	-1.20212	0.296016	-4.061	4.88636e-05	0.000398848
Gm4787	26.6097	-1.20064	0.288845	-4.15669	3.22897e-05	0.000275587
Gm44829	69.257	-1.20024	0.220129	-5.45245	4.96806e-08	8.01399e-07
Klf4	3580.57	-1.19937	0.0804452	-14.9092	2.87172e-50	9.47706e-48
Hebp1	148.343	-1.19698	0.170659	-7.01384	2.31864e-12	7.24909e-11
Ldhb	406.66	-1.19534	0.120768	-9.89776	4.25709e-23	3.20103e-21
Rgs3	59.6374	-1.1953	0.232217	-5.14733	2.64215e-07	3.68644e-06
Gm10686	20.8915	-1.19498	0.286323	-4.17354	2.99907e-05	0.000258098
Gm37101	27.7189	-1.19486	0.296603	-4.02849	5.61369e-05	0.000449872
Hspb2	10.683	-1.19437	0.297167	-4.01917	5.84041e-05	0.000465997
Gm40309	56.883	-1.19277	0.245532	-4.85792	1.18628e-06	1.43666e-05
A430027C01Rik	17.4082	-1.19145	0.297126	-4.00992	6.07406e-05	0.000482372
Gm37588	24.1159	-1.19106	0.290296	-4.10291	4.07979e-05	0.000337825
Gm28693	11.3258	-1.18924	0.297528	-3.99705	6.41366e-05	0.000505959
Tek	186.415	-1.1889	0.152111	-7.816	5.45302e-15	2.28517e-13
Abra	16.4371	-1.1881	0.298097	-3.9856	6.73109e-05	0.000528117
Hpgds	143.639	-1.18638	0.215775	-5.49824	3.8361e-08	6.32106e-07
Gm26736	11.856	-1.18577	0.29785	-3.98111	6.85944e-05	0.000536848
Itgb3	54.7665	-1.18551	0.24113	-4.91646	8.81213e-07	1.10319e-05
Gpr22	42.8159	-1.18427	0.281037	-4.21393	2.50969e-05	0.000221025
Ablim1	57.8032	-1.18363	0.226246	-5.23161	1.68044e-07	2.43766e-06
Klhl32	51.726	-1.18168	0.251828	-4.69241	2.7001e-06	2.96749e-05
Gm42991	17.9786	-1.18151	0.297077	-3.97712	6.97536e-05	0.000545023
Atp8a1	300.03	-1.18136	0.138492	-8.53018	1.46125e-17	7.87706e-16
Vmn2r1	11.9793	-1.17817	0.294339	-4.00278	6.26023e-05	0.000495336
Grm4	21.8826	-1.17704	0.286541	-4.10776	3.99507e-05	0.000331564
Gm48706	78.0307	-1.17702	0.234087	-5.02815	4.95227e-07	6.5922e-06
Kank4	298.211	-1.17537	0.136955	-8.58215	9.31138e-18	5.1453e-16
Rnf213	2339.01	-1.17526	0.0799651	-14.6972	6.7156e-49	2.07233e-46
Gm47643	23.7433	-1.17526	0.286264	-4.10552	4.03404e-05	0.000334565
AC139376,1	36.4987	-1.17329	0.282343	-4.15555	3.24499e-05	0.00027677
C030034L19Rik	443.663	-1.1726	0.111901	-10.4789	1.0794e-25	9.75193e-24
Gm42728	34.1872	-1.17168	0.276194	-4.24222	2.21316e-05	0.000197251
A2m	18.6724	-1.16769	0.290776	-4.01578	5.92506e-05	0.000471643
Rnf157	584.072	-1.16645	0.102771	-11.35	7.41677e-30	8.43206e-28
AC124715,1	13.9766	-1.16537	0.298082	-3.90956	9.24653e-05	0.00069948
Gm37906	60.706	-1.16516	0.241722	-4.82026	1.4337e-06	1.69737e-05
Gm45537	14.6796	-1.16493	0.298141	-3.90732	9.33255e-05	0.00070509
P2rx2	48.8217	-1.16467	0.246364	-4.72742	2.27386e-06	2.54136e-05
Gm45342	18.8556	-1.16386	0.29681	-3.92122	8.81022e-05	0.000670961
Gm3081	63.0146	-1.16287	0.261225	-4.45163	8.52215e-06	8.39879e-05
Gm44044	57.6412	-1.16177	0.255829	-4.5412	5.5936e-06	5.75615e-05
Padi2	116.116	-1.15924	0.191919	-6.04028	1.53847e-09	3.22645e-08
Gm38082	44.1604	-1.15741	0.278376	-4.15772	3.21435e-05	0.000274537
Shcbp1l	105.221	-1.15723	0.240278	-4.81624	1.46292e-06	1.72508e-05
Mettl21c	70.2605	-1.15698	0.255738	-4.52408	6.06586e-06	6.19385e-05
Sh2d4a	25.3245	-1.15685	0.281743	-4.10606	4.02466e-05	0.000333903
Nanos1	319.144	-1.15599	0.13628	-8.48247	2.20463e-17	1.17982e-15
Epb41l3	431.365	-1.15568	0.110302	-10.4774	1.0967e-25	9.7965e-24
Gm37788	13.7375	-1.15247	0.297016	-3.88015	0.000104393	0.000779048
Gm43597	38.9305	-1.15151	0.251794	-4.57322	4.80278e-06	4.99208e-05
Gm37755	27.7284	-1.15061	0.283109	-4.0642	4.8198e-05	0.000394092
Gm43031	36.7044	-1.14558	0.268803	-4.2618	2.02791e-05	0.00018245
Gm48871	11.973	-1.14538	0.295031	-3.88225	0.000103493	0.000772569
Gm44045	100.597	-1.14483	0.233014	-4.91313	8.96334e-07	1.11799e-05
Ucp2	762.145	-1.14398	0.103586	-11.0438	2.34933e-28	2.45914e-26
Rcn1	1895.23	-1.1418	0.0721861	-15.8174	2.35994e-56	1.03842e-53
Hm629797	20.3557	-1.14085	0.295087	-3.86615	0.000110565	0.000819445
Gm14540	30.519	-1.13924	0.276409	-4.12158	3.76277e-05	0.000314592
Gm28791	61.3158	-1.13772	0.271588	-4.18914	2.80012e-05	0.000243534
Ube2d2b	22.9139	-1.13354	0.296708	-3.82039	0.00013324	0.000963752
Gm12926	13.2096	-1.13311	0.298105	-3.80106	0.000144077	0.0010327
Myo5c	309.093	-1.13243	0.125977	-8.98924	2.48952e-19	1.52851e-17
Gm45290	70.0725	-1.13227	0.252378	-4.48641	7.24327e-06	7.24968e-05
Gm47027	12.9991	-1.12955	0.297697	-3.7943	0.000148061	0.00105553
Gm48855	40.6323	-1.12934	0.260492	-4.33543	1.45478e-05	0.000135504
Creb3l2	104.204	-1.12563	0.196512	-5.72806	1.01583e-08	1.83972e-07
Gm24270	226.025	-1.12365	0.177615	-6.32635	2.51025e-10	5.91727e-09
Prkaa2	705.978	-1.12346	0.0975463	-11.5172	1.08056e-30	1.30995e-28
AC158988,1	21.3128	-1.12237	0.29552	-3.79797	0.000145889	0.0010438
Kank1	339.451	-1.12023	0.122871	-9.11718	7.71022e-20	4.87241e-18
Zfp362	83.593	-1.11806	0.201036	-5.56152	2.67437e-08	4.51639e-07
Slc16a4	153.605	-1.11739	0.194795	-5.73626	9.67921e-09	1.76101e-07
A530083M17Rik	20.9281	-1.11628	0.293415	-3.80444	0.000142124	0.00102117
Gm47603	21.9623	-1.116	0.286687	-3.89276	9.91093e-05	0.000743351
B4galt6	1959.37	-1.11493	0.0795934	-14.0078	1.39741e-44	3.25528e-42
Gm37407	40.3298	-1.11423	0.280884	-3.96687	7.2822e-05	0.000565465
Gm38120	23.9505	-1.11395	0.296752	-3.75381	0.000174168	0.00121933
Trpa1	77.6799	-1.1136	0.204007	-5.45863	4.79827e-08	7.76118e-07
Gpr183	47.4824	-1.11355	0.274417	-4.05789	4.95191e-05	0.000403091
Ecm2	90.7841	-1.11296	0.298139	-3.73303	0.000189189	0.00130716
Palmd	9.03074	-1.11031	0.291585	-3.80786	0.000140176	0.00100834
Gm48887	12.6765	-1.11002	0.295735	-3.75343	0.000174433	0.00122046
Tm6sf1	212.215	-1.10951	0.143003	-7.75866	8.58304e-15	3.53452e-13
AC154532,2	22.0968	-1.10948	0.291917	-3.80067	0.000144307	0.00103373
Gm18398	8.21189	-1.10758	0.287293	-3.85521	0.000115629	0.000850078
Actl10	27.3255	-1.1072	0.282247	-3.92279	8.7529e-05	0.000667023
AU040972	16.667	-1.10671	0.297735	-3.71708	0.000201536	0.00137923
Gm20412	27.0631	-1.10494	0.277864	-3.97654	6.99245e-05	0.000546179
Grip2	48.9423	-1.10333	0.254711	-4.33169	1.47968e-05	0.000137553
Sirpa	101.749	-1.10286	0.184801	-5.96782	2.40442e-09	4.89139e-08
Gm37258	213.874	-1.0989	0.293052	-3.74984	0.000176946	0.00123369
Gm48869	12.7511	-1.0986	0.297679	-3.69053	0.000223785	0.00151061
Gm15342	117.452	-1.09826	0.202357	-5.42732	5.72061e-08	9.12264e-07
Gm37726	86.7653	-1.09799	0.246795	-4.449	8.62712e-06	8.48465e-05
Gm32036	12.0387	-1.09689	0.296358	-3.70124	0.000214545	0.00145403
Tnfaip8	237.555	-1.0968	0.139685	-7.85198	4.09531e-15	1.73765e-13
Gm42664	182.605	-1.09679	0.189057	-5.80137	6.57743e-09	1.23352e-07
Atp2b4	55.8822	-1.09672	0.226772	-4.83623	1.32322e-06	1.58314e-05
Adam22	220.798	-1.09317	0.148288	-7.37195	1.68156e-13	6.0174e-12
Proser2	98.0343	-1.09208	0.188086	-5.80631	6.38652e-09	1.20341e-07
Gm44445	20.8752	-1.09168	0.297764	-3.66625	0.000246134	0.00164174
Kcnj12	56.5658	-1.09158	0.227017	-4.80836	1.5217e-06	1.78378e-05
Hdac7	94.41	-1.09088	0.194412	-5.61118	2.00954e-08	3.47263e-07
Ism2	36.9868	-1.09075	0.259261	-4.20714	2.58623e-05	0.000227009
Gm48188	15.5534	-1.08869	0.297404	-3.66063	0.000251597	0.00167222
Gm37509	42.8841	-1.08752	0.266679	-4.07803	4.54192e-05	0.000373169
Gm47665	16.2395	-1.08642	0.296324	-3.66632	0.000246067	0.00164174
Gm15412	14.0715	-1.08638	0.298037	-3.64513	0.000267262	0.00176351
C530043K16Rik	27.2401	-1.08553	0.283545	-3.82843	0.000128965	0.000937612
Ak3l2-ps	176.021	-1.08552	0.159959	-6.78622	1.15111e-11	3.27171e-10
AC120375,1	128.686	-1.08467	0.21783	-4.97944	6.37692e-07	8.27537e-06
Utrn	2731.95	-1.08393	0.0744355	-14.562	4.89699e-48	1.43651e-45
Gm37297	19.4225	-1.08321	0.296314	-3.6556	0.000256578	0.00169821
Gm12059	19.0192	-1.08275	0.294004	-3.68276	0.000230724	0.00155348
Gm37216	14.7253	-1.08248	0.298079	-3.63151	0.000281763	0.00183827
Gm45534	14.7588	-1.08211	0.297854	-3.63302	0.00028012	0.00182906
C130083A15Rik	23.3621	-1.08182	0.295101	-3.66595	0.000246423	0.00164197
Elf4	160.73	-1.08104	0.157659	-6.85681	7.04155e-12	2.06052e-10
Sorbs1	153.838	-1.08052	0.179095	-6.0332	1.6074e-09	3.35915e-08
Gm37706	11.3154	-1.08018	0.296591	-3.64197	0.000270559	0.00178032
C78197	16.7712	-1.07804	0.296056	-3.64134	0.000271223	0.0017842
Epha4	921.28	-1.07784	0.0914969	-11.7801	4.94329e-32	6.48937e-30
Gm38034	28.7404	-1.0763	0.285669	-3.76764	0.000164801	0.00116059
Nlrx1	79.0211	-1.07482	0.207963	-5.16832	2.36213e-07	3.33492e-06
Gm43972	10.7918	-1.07449	0.297274	-3.61447	0.000300967	0.00194222
Gm47197	12.0168	-1.07413	0.297833	-3.60648	0.000310381	0.00199431
Gm42986	89.1268	-1.07163	0.241277	-4.44151	8.93306e-06	8.74211e-05
Gm19325	121.795	-1.07134	0.288893	-3.70845	0.000208531	0.00142055
Runx1	38.7421	-1.0713	0.2546	-4.20779	2.57875e-05	0.000226436
AC133496,1	14.7646	-1.07056	0.297667	-3.59651	0.000322514	0.00206098
Gm37212	6.75521	-1.0692	0.279104	-3.83084	0.000127708	0.000929397
Bcap29	227.473	-1.06896	0.144636	-7.39073	1.46027e-13	5.25718e-12
Gm38157	47.2531	-1.06892	0.273809	-3.90391	9.46511e-05	0.00071397
Dnm1	115.931	-1.06586	0.200004	-5.3292	9.86481e-08	1.50063e-06
Gm42572	30.9846	-1.06571	0.27861	-3.82509	0.000130724	0.000948729
Gm44185	38.1355	-1.06448	0.282149	-3.77275	0.000161456	0.00113919
Stap1	15.1834	-1.06396	0.296495	-3.58844	0.000332661	0.00211346
Gm12116	66.1906	-1.06237	0.237418	-4.47466	7.65312e-06	7.6118e-05
Gatsl2	103.237	-1.06143	0.192402	-5.51671	3.45397e-08	5.73113e-07
AC135083,1	12.9529	-1.06101	0.298133	-3.55885	0.000372489	0.00233159
Gm37018	349.071	-1.06094	0.296908	-3.57329	0.000352517	0.00222179
4930405J17Rik	12.061	-1.06044	0.297589	-3.56343	0.000366042	0.00229744
6720464F23Rik	11.4068	-1.05918	0.297965	-3.55471	0.000378393	0.00236294
Cntln	130.708	-1.05851	0.177959	-5.94802	2.71402e-09	5.44662e-08
Gm43343	14.6794	-1.05834	0.296863	-3.56507	0.000363758	0.00228537
Gm15512	103.153	-1.05834	0.185046	-5.71931	1.06955e-08	1.93113e-07
Krt42	93.2994	-1.05833	0.193368	-5.47313	4.42151e-08	7.20079e-07
Anp32-ps	633.367	-1.05819	0.100641	-10.5144	7.41141e-26	6.82568e-24
Gm47092	12.1218	-1.05684	0.297943	-3.54714	0.000389443	0.00242303
Olfr984	13.9942	-1.05505	0.29799	-3.54056	0.000399284	0.00247648
Gm26780	55.7936	-1.05431	0.244045	-4.32014	1.55929e-05	0.000143996
AC087902,3	29.9515	-1.05361	0.289655	-3.63745	0.000275349	0.00180236
Gm44667	36.0635	-1.05353	0.271057	-3.88673	0.000101603	0.000759659
Gm45477	75.3352	-1.04964	0.232505	-4.51449	6.3468e-06	6.43646e-05
2210406H18Rik	17.7154	-1.04963	0.296596	-3.53892	0.000401774	0.00248867
Gm37589	41.6357	-1.04801	0.272159	-3.85075	0.000117759	0.000864689
Gm45407	27.1699	-1.04732	0.283194	-3.69823	0.000217108	0.00147082
Prss48	18.4144	-1.04724	0.295389	-3.54531	0.000392153	0.00243734
Cpt1a	1599.78	-1.04717	0.0821586	-12.7457	3.2922e-37	5.7519e-35
Gm38377	29.2616	-1.04664	0.293438	-3.5668	0.000361364	0.00227152
Olfr982	7.29699	-1.04509	0.281693	-3.71004	0.000207227	0.00141289
Hsh2d	18.9275	-1.04473	0.290649	-3.59446	0.000325066	0.00207297
Tead4	415.89	-1.04348	0.110601	-9.43469	3.92148e-21	2.71657e-19
Ppnr	12.8009	-1.04333	0.297982	-3.5013	0.000462989	0.00282079
Mob3c	73.6949	-1.04244	0.208987	-4.98806	6.09887e-07	7.95364e-06
Gm10062	10.9228	-1.04196	0.297524	-3.50211	0.000461582	0.00281324
Gm45221	122.405	-1.03919	0.217165	-4.78523	1.70796e-06	1.97579e-05
Cacna2d2	62.7175	-1.0385	0.221001	-4.69906	2.6136e-06	2.88309e-05
AC154528,2	19.2441	-1.03821	0.298032	-3.48355	0.000494812	0.00298331
Ephb2	294.793	-1.03785	0.126947	-8.17548	2.9468e-16	1.42315e-14
Ppp2r2cos	10.9259	-1.03727	0.297442	-3.48728	0.000487953	0.00295168
Grin1os	11.2711	-1.03592	0.297747	-3.47918	0.000502955	0.00302015
Sall1	4723.04	-1.03475	0.0761733	-13.5841	4.97374e-42	1.02766e-39
Gm43788	148.14	-1.03472	0.29595	-3.49628	0.000471797	0.00286857
Alas2	53.2478	-1.03353	0.245802	-4.20471	2.61415e-05	0.000229376
Dcbld1	241.783	-1.03305	0.133628	-7.73078	1.0689e-14	4.34157e-13
1700039I01Rik	21.1081	-1.03232	0.291683	-3.53919	0.000401364	0.00248678
Wipi1	97.5231	-1.03111	0.191342	-5.38883	7.09166e-08	1.1064e-06
Ttn	747.344	-1.03096	0.254133	-4.05678	4.9753e-05	0.00040458
BC022960	25.6257	-1.02991	0.277786	-3.70756	0.000209265	0.00142474
Ypel2	214.398	-1.02968	0.144778	-7.11211	1.14284e-12	3.70972e-11
Gm45358	28.7175	-1.0291	0.279615	-3.68042	0.000232848	0.00156601
Nova2	64.9941	-1.0285	0.227355	-4.52377	6.07481e-06	6.19766e-05
Frmd4a	274.282	-1.02801	0.130298	-7.88966	3.02999e-15	1.30664e-13
Necab1	48.8419	-1.02776	0.242086	-4.24541	2.18191e-05	0.000194757
Syne2	2530.4	-1.02574	0.101651	-10.0908	6.06437e-24	4.86809e-22
Slc8a3	16.7052	-1.0247	0.296359	-3.45762	0.000544979	0.00322843
Gm10997	8.97162	-1.02395	0.293236	-3.49189	0.000479621	0.00291092
Gm26615	42.3192	-1.02359	0.270723	-3.78096	0.000156224	0.00110459
Gm44027	29.3611	-1.02272	0.283296	-3.61009	0.000306087	0.00197045
Inhbb	502.136	-1.02142	0.107365	-9.51351	1.84328e-21	1.29581e-19
9630028B13Rik	21.6299	-1.01969	0.291164	-3.50211	0.000461584	0.00281324
Map2k6	102.532	-1.01943	0.196995	-5.17488	2.28053e-07	3.22738e-06
Tnip1	477.415	-1.01924	0.116386	-8.75739	1.99826e-18	1.1609e-16
Gm48027	98.4876	-1.01886	0.243961	-4.17634	2.96236e-05	0.000255438
Nod2	17.064	-1.01883	0.29415	-3.46365	0.000532894	0.00317028
Gm9747	117.638	-1.01805	0.181818	-5.59931	2.15211e-08	3.69633e-07
Plxdc1	26.6092	-1.01792	0.279758	-3.63858	0.000274148	0.00179797
Gm9968	13.1899	-1.01775	0.294006	-3.46166	0.000536853	0.00318984
Elavl2	647.367	-1.01694	0.102101	-9.96011	2.27816e-23	1.75751e-21
Gm48640	136.281	-1.01658	0.182708	-5.56395	2.63743e-08	4.46353e-07
Gm43696	36.9206	-1.01645	0.267356	-3.80185	0.00014362	0.00103005
D630039A03Rik	12.8302	-1.01592	0.298026	-3.40884	0.000652405	0.00377816
Gm37060	49.7682	-1.01561	0.260481	-3.89898	9.65996e-05	0.000726592
Gm45223	116.366	-1.01561	0.216975	-4.68075	2.85823e-06	3.12107e-05
Zic5	389.278	-1.01495	0.133019	-7.63012	2.34534e-14	9.22645e-13
Gm43792	14.2909	-1.01488	0.297428	-3.4122	0.000644412	0.00373825
Gm37536	8.16525	-1.01427	0.285995	-3.54647	0.000390433	0.00242728
Zfp704	2004.8	-1.01277	0.0797769	-12.695	6.30072e-37	1.05431e-34
Kdelr3	737.072	-1.01271	0.102482	-9.88178	4.99399e-23	3.74329e-21
Vmn2r-ps3	6.42691	-1.01175	0.281458	-3.59466	0.000324816	0.00207193
Gm48139	47.521	-1.01172	0.248963	-4.06376	4.82892e-05	0.000394702
Gm38374	75.1032	-1.01104	0.297965	-3.39314	0.000690962	0.0039676
Gm43482	45.7372	-1.01087	0.264209	-3.82603	0.000130228	0.000945702
Gm37255	27.4273	-1.01015	0.280944	-3.59556	0.000323691	0.00206531
Crtac1	11.3566	-1.00946	0.297928	-3.38825	0.000703392	0.00402827
Arsg	37.7381	-1.00775	0.254419	-3.961	7.46371e-05	0.000578048
Ubxn10	17.9703	-1.00766	0.291174	-3.46066	0.000538848	0.00319889
Slc11a1	8.26213	-1.00737	0.291774	-3.45256	0.000555296	0.00328048
Gm43052	60.8683	-1.00707	0.247205	-4.07385	4.62423e-05	0.000379145
Gm33994	25.749	-1.00703	0.292048	-3.44817	0.000564401	0.00332855
Gm37088	11.7921	-1.00696	0.297575	-3.38387	0.00071471	0.00408325
Hspb8	790.214	-1.00626	0.0950694	-10.5845	3.51662e-26	3.3027e-24
Gm38115	138.4	-1.00411	0.289115	-3.47306	0.00051456	0.00307507
Gabrb1	47.9633	-1.00139	0.258571	-3.87279	0.000107596	0.000799933
C730045M19Rik	18.4531	-1.00113	0.293241	-3.41401	0.000640151	0.00371989
Gm47725	50.5602	1.001	0.237593	4.2131	2.51886e-05	0.000221669
Gap43	95.7038	1.00102	0.193095	5.18408	2.17089e-07	3.08877e-06
Zfp219	2470.27	1.00116	0.0843267	11.8723	1.64795e-32	2.22482e-30
Igkv12-89	9.4498	1.00207	0.294573	3.40176	0.000669529	0.00386414
Gm13283	8.68941	1.00219	0.293347	3.41639	0.000634561	0.00369012
Gm17768	39.0142	1.0028	0.263471	3.8061	0.000141174	0.00101465
Scin	23.4113	1.00353	0.282234	3.55568	0.000376997	0.00235546
Avpr1a	7.90555	1.00383	0.288462	3.47995	0.000501507	0.00301231
Enox1	1378.38	1.00578	0.0792722	12.6877	6.92263e-37	1.15027e-34
Kdr	8.71177	1.00663	0.293523	3.42947	0.000604762	0.00353586
Gm6378	6.09628	1.00716	0.276736	3.63943	0.000273246	0.0017951
Tusc1	55.8458	1.00778	0.232877	4.32751	1.50806e-05	0.000139651
Zfhx3	543.551	1.00825	0.122854	8.20686	2.27056e-16	1.10555e-14
Etfbkmt	131.516	1.00925	0.171777	5.87536	4.21929e-09	8.21086e-08
Gm16421	973.461	1.01085	0.0889359	11.366	6.17191e-30	7.1537e-28
Gm13192	43.1933	1.01213	0.250471	4.0409	5.32455e-05	0.00042858
Zfp987	129.321	1.01241	0.177551	5.7021	1.1834e-08	2.11738e-07
Fam46d	11.4792	1.01385	0.297284	3.41038	0.000648733	0.00375964
Pdgfd	18.8425	1.01557	0.293111	3.4648	0.000530628	0.00315759
Sertad1	642.571	1.01625	0.111799	9.09001	9.90256e-20	6.19197e-18
Nrp1	22.3329	1.01682	0.287158	3.54097	0.000398654	0.00247322
Dus3l	1594.37	1.01685	0.0769332	13.2173	6.97384e-40	1.36947e-37
Gm15136	5.59142	1.01716	0.271194	3.75067	0.000176362	0.00123143
Pxdn	762.649	1.0196	0.0915055	11.1425	7.79141e-29	8.33926e-27
Kcns1	62.4395	1.0225	0.227361	4.49723	6.88432e-06	6.92541e-05
D5Ertd605e	33.1695	1.02277	0.266062	3.84411	0.00012099	0.000885659
Anxa2	137.341	1.023	0.177068	5.77744	7.58473e-09	1.40578e-07
Brinp1	17.3941	1.02308	0.293378	3.48723	0.000488054	0.00295168
Adgra2	237.928	1.0237	0.142721	7.17274	7.3509e-13	2.46354e-11
Gm44186	6.03914	1.02448	0.278014	3.685	0.000228705	0.0015412
Palld	2232.69	1.02608	0.0725427	14.1445	2.01902e-45	4.99728e-43
Slc25a38	648.932	1.02624	0.102695	9.99308	1.63418e-23	1.27729e-21
Mgat4c	20.3941	1.0266	0.291429	3.52264	0.000427275	0.00263359
Eprn	170.484	1.02784	0.162341	6.3314	2.42953e-10	5.74408e-09
Ush2a	26.6298	1.02845	0.276312	3.72206	0.000197601	0.00135739
Mt2	2388.37	1.0285	0.100471	10.2368	1.35586e-24	1.13041e-22
Nrip3	104.053	1.03066	0.1868	5.51744	3.43967e-08	5.71139e-07
Gm18189	48.5489	1.03132	0.250432	4.11817	3.8189e-05	0.000318613
Cyp26a1	17.7187	1.03366	0.296192	3.48983	0.000483325	0.00292966
Gm10827	26.8614	1.03476	0.27725	3.73222	0.000189797	0.00131022
Them4	157.52	1.03727	0.160372	6.46787	9.93952e-11	2.46785e-09
Col6a4	12.501	1.03794	0.298149	3.48128	0.00049902	0.00300292
Hormad1	52.0875	1.03997	0.23854	4.35973	1.30226e-05	0.00012318
Cysltr1	11.7875	1.04028	0.298138	3.48925	0.000484374	0.00293527
Ces4a	22.3573	1.04246	0.285167	3.6556	0.000256579	0.00169821
Zfp608	53.4387	1.04301	0.231636	4.50281	6.70613e-06	6.75761e-05
Snora78	1164.4	1.04349	0.213524	4.887	1.02384e-06	1.2618e-05
Gpr135	216.987	1.04352	0.142848	7.30506	2.7714e-13	9.70209e-12
Mt1	2784.54	1.0437	0.0779513	13.3892	6.99661e-41	1.40887e-38
Akr1e1	155.583	1.04494	0.163151	6.40474	1.50623e-10	3.67448e-09
4930458D05Rik	13.8143	1.04723	0.297884	3.51556	0.000438826	0.00269569
Cybb	9.69872	1.04772	0.295604	3.54434	0.000393595	0.00244566
Car4	67.3187	1.04773	0.21999	4.76263	1.91087e-06	2.17766e-05
2810429I04Rik	541.87	1.0492	0.109922	9.54492	1.36215e-21	9.66148e-20
Dubr	68.8287	1.04955	0.220057	4.76944	1.84739e-06	2.1175e-05
Gm48168	31.8851	1.05018	0.272054	3.86018	0.000113305	0.000836097
4930566F21Rik	582.345	1.05086	0.103946	10.1097	5.00245e-24	4.04297e-22
Fkbp6	6.36958	1.05094	0.279082	3.7657	0.000166085	0.00116894
Fjx1	342.446	1.05102	0.120812	8.69966	3.3289e-18	1.90139e-16
4933438K21Rik	12.9936	1.05228	0.298152	3.52935	0.00041658	0.00257502
Prmt2	132.413	1.0537	0.170613	6.17598	6.57554e-10	1.45071e-08
Vwa5a	259.581	1.05436	0.1465	7.19701	6.15477e-13	2.07732e-11
Gm45089	8.67204	1.05444	0.292275	3.60771	0.000308906	0.00198591
Rny3	1239.71	1.05487	0.248954	4.2372	2.26323e-05	0.000201185
St6gal2	20.2872	1.05648	0.288712	3.65927	0.000252939	0.00167926
Tmcc3	100.519	1.05712	0.190429	5.55124	2.83655e-08	4.77333e-07
Asmt	7.28767	1.05985	0.288138	3.67826	0.000234828	0.0015764
Hopxos	36.9469	1.06019	0.263274	4.02696	5.65033e-05	0.000452198
Tnxa	5.74808	1.06284	0.274178	3.87647	0.000105985	0.000789436
Gatm	91.3153	1.06323	0.200344	5.30704	1.11423e-07	1.67564e-06
Zfp541	18.753	1.06534	0.292	3.64843	0.000263852	0.00174198
Gm14401	534.414	1.0658	0.143526	7.42583	1.12074e-13	4.06564e-12
Gm16411	33.5118	1.06624	0.265606	4.01438	5.96032e-05	0.000474131
Vat1l	44.2639	1.06711	0.246014	4.3376	1.44044e-05	0.000134279
Jph1	346.2	1.06799	0.121804	8.76808	1.81738e-18	1.0584e-16
Gpr37	6.32193	1.07015	0.280135	3.82013	0.000133379	0.000964464
Zfp819	1009.52	1.0709	0.084191	12.7198	4.58762e-37	7.78617e-35
Selenop	277.808	1.07337	0.136404	7.86908	3.57253e-15	1.52674e-13
AC154256,1	22.6428	1.0739	0.287714	3.73254	0.00018956	0.00130934
Rxrg	14.2647	1.07567	0.297636	3.61405	0.000301456	0.00194485
Fmn2	379.008	1.07583	0.122589	8.77595	1.69462e-18	9.91768e-17
Itga1	97.1497	1.0764	0.191967	5.60723	2.05587e-08	3.53982e-07
4930548H24Rik	665.713	1.07659	0.103257	10.4264	1.87933e-25	1.63571e-23
Ankub1	7.60147	1.07669	0.288092	3.73731	0.000186001	0.00128776
Plxna4	10.0486	1.07679	0.295988	3.63794	0.000274825	0.00179976
Pitx2	37.5062	1.07757	0.257724	4.18111	2.90092e-05	0.000250559
Ifi203-ps	5.85447	1.07884	0.27508	3.9219	8.78539e-05	0.000669284
AC131586,3	27.7111	1.07978	0.277139	3.89617	9.77265e-05	0.000734113
Zcchc12	22.8958	1.08028	0.2842	3.80112	0.000144042	0.0010327
Thbs3	329.518	1.08185	0.1261	8.57928	9.5466e-18	5.25562e-16
Ret	38.2281	1.08255	0.256139	4.22639	2.3747e-05	0.000210307
Bmp1	176.388	1.08298	0.152094	7.12051	1.07529e-12	3.50478e-11
Gm11841	15.5158	1.08349	0.29666	3.65228	0.000259924	0.00171796
Gm26887	27.1876	1.08359	0.285385	3.79694	0.00014649	0.00104716
Zfp989	11.9281	1.08391	0.298007	3.63718	0.000275638	0.00180366
Cntn3	16.5451	1.08499	0.295067	3.67709	0.000235909	0.00158167
Akr1b3	251.445	1.08542	0.153899	7.05278	1.75373e-12	5.57835e-11
Exoc3l	1065.19	1.08726	0.0934023	11.6406	2.56187e-31	3.18705e-29
Olfr836	11.5483	1.08797	0.297392	3.65837	0.000253825	0.00168354
Fam84a	71.3899	1.08806	0.216795	5.01885	5.19808e-07	6.90395e-06
Gm48529	147.468	1.09197	0.164779	6.62688	3.42851e-11	9.10221e-10
Zfp936	2942.04	1.09212	0.0826437	13.2148	7.21153e-40	1.40454e-37
Gm7972	418.412	1.09309	0.112152	9.74649	1.90962e-22	1.39614e-20
AC123692,2	8.12798	1.09405	0.288411	3.79336	0.000148624	0.00105859
Selenoh	2107.12	1.0946	0.086632	12.6351	1.35226e-36	2.20076e-34
Gm25541	90.049	1.10004	0.242464	4.53692	5.70829e-06	5.86402e-05
Styk1	34.9583	1.10211	0.264734	4.16306	3.14006e-05	0.000268771
Robo3	44.9508	1.10247	0.250417	4.40256	1.06983e-05	0.000102878
Dpep3	27.3679	1.10338	0.275101	4.01083	6.05059e-05	0.000480669
A930004D18Rik	141.1	1.10342	0.166994	6.60753	3.90789e-11	1.02944e-09
Pon2	254.972	1.10525	0.137566	8.03437	9.40632e-16	4.33147e-14
Nudt10	52.8371	1.10674	0.239432	4.62238	3.79367e-06	4.04552e-05
Atf7ip	3814.89	1.10779	0.0790893	14.0069	1.41483e-44	3.26386e-42
A930024E05Rik	242.841	1.11037	0.13778	8.05898	7.69331e-16	3.57033e-14
Slitrk2	12.7261	1.11191	0.298152	3.72936	0.000191969	0.00132291
Gm43366	6.91315	1.11432	0.281968	3.95195	7.75183e-05	0.000599191
Penk	31.5313	1.11712	0.269219	4.14951	3.33193e-05	0.00028356
Clec1a	9.60269	1.11865	0.295687	3.78322	0.000154814	0.00109643
Gm47939	6.2975	1.12132	0.277192	4.04527	5.22631e-05	0.000421704
Gm20163	282.236	1.12148	0.136049	8.24325	1.676e-16	8.26212e-15
Fam221a	171.84	1.12228	0.158244	7.09212	1.32068e-12	4.25214e-11
Hsf5	48.0225	1.12393	0.240553	4.67229	2.97861e-06	3.24506e-05
Gm4349	41.7731	1.12462	0.252878	4.44729	8.69615e-06	8.53487e-05
Igf2os	18.528	1.12561	0.293712	3.83236	0.00012692	0.000924224
Il3ra	121.892	1.12644	0.1835	6.13862	8.32422e-10	1.81961e-08
Hopx	208.705	1.12678	0.149193	7.55252	4.2691e-14	1.63874e-12
Tinagl1	52.2936	1.12831	0.243229	4.6389	3.50261e-06	3.76416e-05
Pisd-ps1	69.2354	1.12835	0.218572	5.16239	2.43817e-07	3.428e-06
Ramp3	219.843	1.12852	0.150727	7.48718	7.03675e-14	2.58824e-12
Gm29895	15.5991	1.13175	0.298023	3.79753	0.000146148	0.00104503
C920009B18Rik	17.6417	1.13201	0.293457	3.8575	0.000114551	0.000843672
A930024N18Rik	23.2387	1.134	0.285297	3.97479	7.04409e-05	0.00054949
Mrc1	89.924	1.13508	0.198802	5.70959	1.13247e-08	2.03391e-07
Hoxd13	40.3149	1.13522	0.254795	4.45544	8.37216e-06	8.26812e-05
Lzts1	29.9142	1.13543	0.271813	4.17724	2.95065e-05	0.000254669
Nefl	1054.35	1.13768	0.0991294	11.4767	1.72788e-30	2.08406e-28
Gm20300	253.032	1.13804	0.143792	7.91448	2.48281e-15	1.08445e-13
Bcl6b	465.799	1.14021	0.111143	10.2589	1.07891e-24	9.02675e-23
Gm20559	17.4303	1.14526	0.294382	3.89041	0.000100075	0.000749886
Tmem253	156.036	1.14666	0.172646	6.6417	3.10093e-11	8.32556e-10
Dok2	769.298	1.14759	0.0969926	11.8318	2.67488e-32	3.59084e-30
Cdh10	31.7104	1.1479	0.276829	4.14661	3.37439e-05	0.000286386
Nrk	133.215	1.14916	0.173684	6.61637	3.68135e-11	9.72997e-10
Fcrl5	8.25897	1.15047	0.2906	3.95895	7.528e-05	0.000582838
Rnu3a	8278.58	1.15258	0.291479	3.95423	7.67824e-05	0.000593889
Raet1e	347.485	1.15364	0.123823	9.31689	1.19799e-20	7.92909e-19
Nhlrc1	66.1371	1.15548	0.236404	4.88775	1.01993e-06	1.25828e-05
Tbx20	667.443	1.15846	0.0992067	11.6772	1.66682e-31	2.11793e-29
Calcr	42.1061	1.15892	0.256467	4.51879	6.21936e-06	6.32612e-05
Gm48218	10.1055	1.16009	0.296194	3.91666	8.97856e-05	0.000682468
Gm2762	32.7367	1.1612	0.266936	4.35011	1.36067e-05	0.000127969
Btnl7-ps	26.4635	1.16154	0.280085	4.14712	3.36689e-05	0.000286228
Folr1	1025.8	1.16311	0.0988478	11.7667	5.79763e-32	7.56909e-30
Mal	23.0534	1.16383	0.284761	4.08703	4.36935e-05	0.000359987
Nlrp14	29.1674	1.16411	0.272505	4.27191	1.93807e-05	0.000175097
Sfmbt2	164.612	1.16438	0.16121	7.2228	5.0929e-13	1.74119e-11
L3mbtl3	461	1.16509	0.106901	10.8988	1.16827e-27	1.17624e-25
Slc16a2	29.949	1.16582	0.272212	4.28277	1.84577e-05	0.000167394
Casp8	197.673	1.16589	0.148249	7.86436	3.70979e-15	1.58256e-13
Gm16475	6.48031	1.16602	0.279623	4.16996	3.04647e-05	0.000261703
Ulbp1	582.487	1.16615	0.109094	10.6894	1.14109e-26	1.10217e-24
Gm14005	23.5695	1.16991	0.282336	4.14368	3.41782e-05	0.000289316
Ptpn13	428.196	1.17217	0.111664	10.4973	8.88501e-26	8.11987e-24
Pcdh1	282.527	1.17332	0.139298	8.42312	3.6658e-17	1.9142e-15
Lrrc6	19.3376	1.17574	0.295561	3.97799	6.95014e-05	0.000543231
Ccny	3379.59	1.17644	0.0737589	15.9497	2.86092e-57	1.30728e-54
Gm25989	89.5903	1.17656	0.209434	5.6178	1.93408e-08	3.34955e-07
Adad2	231.353	1.18424	0.14679	8.06759	7.17014e-16	3.34058e-14
Prr14	988.996	1.18611	0.0920997	12.8786	5.94306e-38	1.07796e-35
Cyr61	1117.2	1.18888	0.0968635	12.2738	1.2525e-34	1.83708e-32
Zfp229	1477.21	1.18925	0.0831753	14.2981	2.248e-46	6.13961e-44
Fxyd5	11.7826	1.19037	0.297832	3.99678	6.42109e-05	0.000506377
Gm30414	9.31531	1.19068	0.293415	4.05801	4.94932e-05	0.000403019
Tex15	6293.27	1.19091	0.0838241	14.2072	8.26708e-46	2.13515e-43
Gm3786	7.2516	1.19252	0.285544	4.17631	2.96279e-05	0.000255438
Lama4	42.8067	1.19348	0.251551	4.7445	2.09019e-06	2.35826e-05
Ifi203	7.25383	1.19453	0.285421	4.18514	2.84984e-05	0.000247045
Ptk2b	667.99	1.19532	0.102385	11.6748	1.71429e-31	2.16666e-29
4930432E11Rik	7.43353	1.19584	0.285266	4.19202	2.76478e-05	0.000240902
Tmprss11f	29.9923	1.1964	0.272649	4.38805	1.14369e-05	0.00010927
Tdrd1	58.9698	1.19699	0.228365	5.24156	1.59224e-07	2.32106e-06
Gm9934	42.8599	1.19737	0.250121	4.78718	1.69144e-06	1.95955e-05
Rimbp2	41.5351	1.19785	0.256241	4.6747	2.94388e-06	3.21017e-05
Sox3	48.4865	1.19812	0.241993	4.95106	7.38103e-07	9.41894e-06
Grb10	596.067	1.19903	0.107672	11.1359	8.38893e-29	8.93853e-27
Gm17184	7.37039	1.1994	0.285689	4.19825	2.6898e-05	0.000235491
Amigo2	83.0764	1.19965	0.203384	5.89843	3.66968e-09	7.23613e-08
BC021767	14.9699	1.20159	0.298084	4.03104	5.55314e-05	0.00044547
Gm364	16.7377	1.20238	0.29522	4.07283	4.64459e-05	0.000380683
Zfp428	1188.42	1.21101	0.0977592	12.3877	3.04701e-35	4.7013e-33
Ccdc85a	312.317	1.21285	0.128479	9.44005	3.72606e-21	2.58874e-19
Arhgef5	302.679	1.21422	0.129241	9.395	5.72169e-21	3.8955e-19
Gm15609	63.5866	1.21714	0.232399	5.23729	1.62954e-07	2.36962e-06
Slc8a1	13.2661	1.21897	0.298137	4.08863	4.33929e-05	0.000357758
Gm26640	91.0244	1.22147	0.198143	6.16457	7.06767e-10	1.55495e-08
Gprc5c	453.367	1.2265	0.111628	10.9874	4.39276e-28	4.51846e-26
Lmo4	324.922	1.22799	0.139869	8.77958	1.64093e-18	9.62718e-17
Gsap	10.7057	1.22815	0.296921	4.13627	3.5299e-05	0.000297743
Ctgf	1572.44	1.22967	0.0778176	15.802	3.01582e-56	1.30289e-53
Ctsc	191.615	1.23127	0.14804	8.31715	9.01028e-17	4.53588e-15
Prokr2	18.4945	1.23159	0.293482	4.19649	2.71085e-05	0.000236985
Gm22513	1250.13	1.23408	0.124196	9.93653	2.88702e-23	2.20574e-21
Dusp4	2066.93	1.23808	0.0762709	16.2327	2.96067e-59	1.40697e-56
Gm6445	298.127	1.23829	0.129871	9.53478	1.50207e-21	1.06222e-19
Tdrd12	428.326	1.23852	0.112868	10.9732	5.14252e-28	5.26687e-26
Sp8	36.1497	1.23982	0.269199	4.60558	4.11326e-06	4.34572e-05
Wt1	163.904	1.24115	0.170096	7.29677	2.94755e-13	1.02844e-11
Zfp809	1244.54	1.24212	0.0819698	15.1534	7.19224e-52	2.51316e-49
Csrnp1	1327.87	1.24421	0.0915069	13.5969	4.17872e-42	8.70969e-40
Gm19554	9.64129	1.245	0.29472	4.22435	2.39633e-05	0.000212064
Lfng	126.621	1.24605	0.177853	7.00607	2.451e-12	7.63278e-11
Nefm	430.575	1.24842	0.11762	10.614	2.5662e-26	2.43902e-24
Vmn2r-ps159	7.84592	1.24875	0.282567	4.41929	9.90276e-06	9.60014e-05
Gm3604	588.69	1.24897	0.108973	11.4613	2.06322e-30	2.47597e-28
Myc	1543.19	1.25004	0.0981781	12.7324	3.9069e-37	6.67854e-35
C130071C03Rik	17.4331	1.25411	0.294356	4.26051	2.03958e-05	0.000183223
Fam181b	87.4506	1.25453	0.205996	6.09006	1.12865e-09	2.41385e-08
Plk3	1482.64	1.25691	0.0887794	14.1577	1.67367e-45	4.18612e-43
9330121J05Rik	104.145	1.25705	0.186553	6.73829	1.60267e-11	4.45391e-10
Gm40457	7.82873	1.25911	0.287618	4.37773	1.19919e-05	0.000114113
Ankrd45	157.843	1.25961	0.164041	7.67861	1.60829e-14	6.42263e-13
Gstp2	26.3996	1.26121	0.28195	4.47319	7.70622e-06	7.6582e-05
Tmem181c-ps	24.7836	1.26493	0.282389	4.47939	7.48577e-06	7.4641e-05
AC013548,1	10.087	1.27035	0.294775	4.30955	1.63588e-05	0.000150136
Atp8b1	12.3575	1.27038	0.29812	4.26131	2.03235e-05	0.000182781
Foxh1	864.981	1.27048	0.0913572	13.9067	5.76886e-44	1.29315e-41
Selenow	343.558	1.27092	0.127817	9.94331	2.69715e-23	2.06732e-21
Gm19428	38.8217	1.27203	0.272526	4.66756	3.04796e-06	3.31151e-05
Crabp2	122.062	1.27217	0.178539	7.12542	1.03761e-12	3.39597e-11
Grin2a	49.5808	1.27413	0.24851	5.12707	2.94292e-07	4.05843e-06
Crmp1	442.127	1.27617	0.114851	11.1115	1.10279e-28	1.1698e-26
Gm26532	118.736	1.27747	0.188383	6.78123	1.1916e-11	3.36667e-10
Apela	715.432	1.27877	0.107655	11.8784	1.53255e-32	2.08085e-30
Slc40a1	158.51	1.28043	0.169797	7.54096	4.66534e-14	1.76518e-12
Rbm46	55.2781	1.28323	0.238717	5.37552	7.6362e-08	1.18281e-06
Wnt8a	34.266	1.28344	0.265585	4.83248	1.34841e-06	1.60922e-05
Tmem267	302.242	1.28938	0.137542	9.37445	6.95354e-21	4.72066e-19
Fgf5	21.9068	1.28939	0.288467	4.4698	7.82918e-06	7.77389e-05
Nes	1633.98	1.29098	0.0762175	16.9381	2.35553e-64	1.30162e-61
Olfr31	26.2814	1.29391	0.282941	4.57306	4.8065e-06	4.99375e-05
Rasgrp3	19.6554	1.29459	0.292574	4.42482	9.6521e-06	9.37627e-05
Asb13	404.8	1.29488	0.125243	10.339	4.69654e-25	4.01419e-23
Gm44344	116.729	1.29505	0.190226	6.80795	9.89979e-12	2.85126e-10
Pou4f2	1981.88	1.29544	0.0763873	16.9589	1.65527e-64	9.3645e-62
Cdh9	69.0489	1.2982	0.225189	5.76491	8.17021e-09	1.50607e-07
Adamts6	58.072	1.29855	0.231478	5.60983	2.0253e-08	3.49733e-07
4833422M21Rik	38.4355	1.30194	0.274152	4.74897	2.04456e-06	2.31337e-05
Samd4	196.486	1.30283	0.151389	8.6059	7.57183e-18	4.23328e-16
Cd209c	7.58266	1.3031	0.285357	4.56656	4.958e-06	5.13544e-05
Zyx	610.462	1.30563	0.11497	11.3563	6.90449e-30	7.95684e-28
Tmem59l	228.017	1.30611	0.154888	8.43262	3.38016e-17	1.76907e-15
Gpat3	65.5794	1.30669	0.22402	5.83293	5.44617e-09	1.03858e-07
Gm13231	187.092	1.30674	0.1596	8.1876	2.66479e-16	1.2922e-14
Gm26715	12.5352	1.307	0.297811	4.3887	1.14032e-05	0.000108991
Peg10	13798.9	1.30939	0.0642771	20.371	3.0265e-92	3.99514e-89
Aldh1a3	28.2069	1.31023	0.277347	4.72417	2.31052e-06	2.57868e-05
Xkr4	14.87	1.31559	0.297291	4.42526	9.63244e-06	9.36696e-05
Tnfrsf8	33.5325	1.31611	0.270533	4.86489	1.14521e-06	1.39332e-05
Clec2i	10.01	1.31745	0.293913	4.48244	7.37951e-06	7.37052e-05
Plod2	2518.76	1.31987	0.0756281	17.4521	3.32007e-68	1.97221e-65
Gm10324	25.2511	1.32083	0.284155	4.64827	3.34724e-06	3.61517e-05
Ankrd36	12.4938	1.32319	0.297969	4.44071	8.96617e-06	8.75648e-05
Syce3	26.7789	1.32524	0.284631	4.65599	3.22421e-06	3.48932e-05
Adrb3	882.583	1.32662	0.0947021	14.0084	1.38578e-44	3.25528e-42
Gm15270	281.782	1.32706	0.129305	10.263	1.03421e-24	8.68337e-23
Srms	51.6628	1.3274	0.237766	5.58281	2.36657e-08	4.03965e-07
Gm7344	13.5997	1.3275	0.297976	4.45506	8.38684e-06	8.27917e-05
Slc39a8	161.112	1.34014	0.16292	8.22575	1.93965e-16	9.52234e-15
Zfp37	1042.43	1.34247	0.0937404	14.3211	1.61464e-46	4.46109e-44
Gm17177	28.1903	1.34959	0.276635	4.8786	1.06844e-06	1.30997e-05
1700029P11Rik	152.381	1.34975	0.169551	7.9607	1.71063e-15	7.61164e-14
Rdm1	613.215	1.35409	0.111875	12.1036	1.01115e-33	1.41329e-31
Gm16211	51.4847	1.35483	0.243599	5.56173	2.67117e-08	4.51419e-07
Alox5ap	30.6515	1.35914	0.273626	4.96715	6.7944e-07	8.75973e-06
Neto2	347.308	1.36012	0.133374	10.1978	2.02725e-24	1.67255e-22
Dusp8	47.3737	1.36049	0.245965	5.5312	3.18039e-08	5.31055e-07
Zfp961	3099.65	1.36053	0.0725082	18.7639	1.4919e-78	1.14352e-75
F5	48.156	1.36169	0.244119	5.578	2.43299e-08	4.14411e-07
Pdzd2	727.237	1.36196	0.104093	13.084	4.06223e-39	7.72182e-37
Prob1	390.289	1.36504	0.11928	11.4441	2.51801e-30	2.97663e-28
Dnah12	44.9175	1.36868	0.24921	5.49208	3.97236e-08	6.53652e-07
Tmem40	31.8251	1.37112	0.269474	5.08812	3.61636e-07	4.89899e-06
Syce1	144.672	1.37321	0.172201	7.97444	1.53068e-15	6.82375e-14
Ildr2	55.441	1.37661	0.237828	5.78827	7.11159e-09	1.32845e-07
Shank3	749.181	1.37721	0.105134	13.0996	3.3114e-39	6.34534e-37
Gm38158	78.9284	1.38523	0.212626	6.51483	7.27699e-11	1.85127e-09
Gm11771	14.2257	1.38606	0.298137	4.64909	3.33405e-06	3.6042e-05
Bin1	271.665	1.38887	0.136753	10.1561	3.11289e-24	2.55053e-22
Gm16136	28.9245	1.39029	0.275729	5.04224	4.60113e-07	6.1489e-06
Otx2	770.892	1.39226	0.0947965	14.6869	7.82241e-49	2.38293e-46
Zfp982	419.578	1.39642	0.121032	11.5376	8.53063e-31	1.03947e-28
Dmrtc1b	10.3387	1.39643	0.293221	4.76238	1.91321e-06	2.17928e-05
Lgals1	1214.12	1.39663	0.0964726	14.4769	1.69457e-47	4.91032e-45
Col3a1	9.9561	1.39687	0.293699	4.75613	1.9734e-06	2.23999e-05
Gm29243	15.3746	1.39855	0.297453	4.70173	2.57969e-06	2.85097e-05
Gm14109	45.5726	1.39866	0.248191	5.63542	1.74635e-08	3.04885e-07
Hmga2	698.999	1.39957	0.0974611	14.3603	9.18564e-47	2.59833e-44
Platr27	53.5857	1.4018	0.238458	5.8786	4.1374e-09	8.0647e-08
4930524B15Rik	37.6417	1.40218	0.261077	5.37075	7.84097e-08	1.21137e-06
Sycp2	38.9677	1.40338	0.258534	5.42824	5.69117e-08	9.0818e-07
Irgm1	136.691	1.40405	0.180567	7.77578	7.49866e-15	3.1041e-13
Itga3	1311.43	1.40984	0.0855782	16.4742	5.61887e-61	2.84064e-58
Gm43041	8.66392	1.42159	0.289213	4.91536	8.86178e-07	1.10824e-05
Tmem181a	278.4	1.42342	0.130427	10.9135	9.93142e-28	1.00846e-25
Kcnf1	42.4143	1.42742	0.253998	5.61981	1.91169e-08	3.31559e-07
Cd34	81.9008	1.42858	0.205521	6.95101	3.62674e-12	1.09917e-10
Creb5	58.0384	1.43963	0.245079	5.87412	4.25086e-09	8.25202e-08
Olfr365	11.0891	1.45091	0.296114	4.89985	9.59087e-07	1.19064e-05
Spta1	550.861	1.45273	0.111377	13.0434	6.93192e-39	1.30722e-36
Btbd17	10.2147	1.45386	0.294881	4.93031	8.20974e-07	1.0331e-05
Ltb	20.293	1.45444	0.291286	4.99315	5.9401e-07	7.79794e-06
AC154506,1	64.3577	1.45627	0.230402	6.32057	2.60601e-10	6.11871e-09
Tuba3a	37.3387	1.45885	0.266214	5.47999	4.25358e-08	6.96549e-07
Rnf17	1629.46	1.45909	0.0758882	19.2268	2.20897e-82	2.01874e-79
Epha1	266.004	1.46598	0.138652	10.573	3.97398e-26	3.70297e-24
Plaur	1212.36	1.46785	0.103946	14.1214	2.80532e-45	6.87187e-43
Vmn1r-ps135	10.3861	1.46842	0.292763	5.01573	5.28321e-07	7.00527e-06
Mfap3l	292.985	1.46879	0.129564	11.3364	8.66223e-30	9.75466e-28
Arhgap18	290.978	1.47884	0.130392	11.3415	8.17401e-30	9.2487e-28
Cacnb3	799.094	1.47911	0.0973033	15.201	3.48237e-52	1.25371e-49
Dazl	230.115	1.48045	0.174423	8.48769	2.10784e-17	1.13057e-15
Vim	3986.84	1.4825	0.0778851	19.0345	8.84095e-81	7.78036e-78
Nol4	18.9109	1.48569	0.294631	5.04255	4.59368e-07	6.1424e-06
Mmp1b	9.11046	1.48745	0.291107	5.10965	3.22761e-07	4.4177e-06
Lrrk2	76.7746	1.49395	0.217261	6.87631	6.14228e-12	1.813e-10
2810474O19Rik	10950.7	1.49738	0.0630021	23.7671	7.32236e-125	1.73987e-121
Wnt3	82.5354	1.50101	0.210057	7.14575	8.95065e-13	2.9662e-11
Znf41-ps	29.0441	1.50195	0.277015	5.42192	5.89613e-08	9.38993e-07
Olfr913	9.49737	1.50584	0.291432	5.16703	2.37848e-07	3.35204e-06
Foxi3	39.3661	1.50706	0.263777	5.71338	1.10757e-08	1.99522e-07
Plxnc1	324.175	1.50744	0.134655	11.1948	4.32185e-29	4.68911e-27
Grhl2	645.729	1.50855	0.0995803	15.1491	7.68597e-52	2.64676e-49
Nat8f2	10.6255	1.51062	0.293643	5.14439	2.68386e-07	3.73703e-06
Raet1d	40.7357	1.51098	0.256132	5.89924	3.65185e-09	7.21893e-08
Clu	364.618	1.52191	0.12763	11.9244	8.8331e-33	1.20623e-30
Gpx1	5587.89	1.52731	0.0762079	20.0414	2.39895e-89	2.71436e-86
Gm8935	2076.46	1.53107	0.0739257	20.7109	2.76122e-95	4.37395e-92
Gm13241	77.0363	1.53149	0.213983	7.15704	8.24351e-13	2.74333e-11
Tesc	84.6605	1.53473	0.210286	7.29832	2.91392e-13	1.0182e-11
Diras2	16.835	1.54324	0.297232	5.19206	2.07982e-07	2.96809e-06
Gm38391	113.351	1.54445	0.204668	7.54611	4.48439e-14	1.71584e-12
Gm4779	84.0686	1.54581	0.210512	7.34306	2.08758e-13	7.42561e-12
Gc	23.0847	1.54701	0.287085	5.38867	7.09802e-08	1.10667e-06
Hivep2	183.765	1.55176	0.161733	9.59459	8.42503e-22	6.10327e-20
Dpy19l2	14.5737	1.55895	0.298123	5.22922	1.70227e-07	2.46631e-06
Gm37416	19.7356	1.56546	0.294986	5.30689	1.11509e-07	1.67587e-06
Col6a5	47.1394	1.57321	0.254392	6.18418	6.24257e-10	1.38618e-08
Hist1h2aa	185.456	1.58695	0.160042	9.9159	3.55056e-23	2.69537e-21
Slc25a31	53.4283	1.58923	0.247155	6.43008	1.27534e-10	3.13051e-09
Cd209d	19.4553	1.5935	0.29369	5.42579	5.77e-08	9.19524e-07
Nlrp4c	14.8102	1.60083	0.298144	5.36932	7.90323e-08	1.21941e-06
Arl4c	222.716	1.60422	0.148369	10.8124	3.00769e-27	2.97774e-25
Sned1	404.212	1.60529	0.137506	11.6743	1.72421e-31	2.16766e-29
Zfp985	1645.97	1.60549	0.107465	14.9397	1.81827e-50	6.08506e-48
Gadd45g	64.4237	1.61401	0.225994	7.14182	9.21019e-13	3.03949e-11
Cdkn1c	3487.31	1.61729	0.0833344	19.4073	6.69923e-84	6.63252e-81
Glyatl3	39.6255	1.61746	0.258452	6.25825	3.8933e-10	8.93804e-09
Zfp992	107.865	1.61823	0.203497	7.95208	1.83413e-15	8.1156e-14
1700097N02Rik	62.5175	1.6188	0.235351	6.87823	6.06026e-12	1.79102e-10
2410141K09Rik	631.791	1.61955	0.103366	15.6681	2.50026e-55	1.04226e-52
Gm13245	37.0777	1.6223	0.26483	6.12584	9.02079e-10	1.96105e-08
Podxl	882.364	1.62769	0.0904219	18.0011	1.91002e-72	1.26067e-69
Mtus2	95.1855	1.64089	0.202851	8.08911	6.01023e-16	2.83915e-14
Insm1	191.613	1.64176	0.156849	10.4672	1.22268e-25	1.08809e-23
Gm40849	38.1646	1.6453	0.266622	6.17092	6.78949e-10	1.49652e-08
Fthl17f	11.3739	1.64834	0.296137	5.56614	2.60449e-08	4.42038e-07
Enpp2	41.4545	1.64864	0.260686	6.32423	2.54495e-10	5.99311e-09
Kcnk2	16.1494	1.65184	0.298134	5.54058	3.01465e-08	5.04799e-07
Clca3b	101.289	1.66091	0.196484	8.45318	2.8347e-17	1.49678e-15
Gm37352	1040.94	1.66574	0.117551	14.1704	1.39665e-45	3.56838e-43
Nt5e	123.378	1.67159	0.180765	9.24731	2.30218e-20	1.49869e-18
Tex19,1	1096.39	1.67585	0.089207	18.786	9.825e-79	7.78172e-76
Nlrp9b	46.8834	1.67726	0.253603	6.6137	3.74831e-11	9.88497e-10
Pnma5	26.2672	1.6826	0.28285	5.94872	2.70251e-09	5.42809e-08
Gm19792	31.6373	1.68292	0.276269	6.09158	1.11801e-09	2.3954e-08
Gm44732	1310.55	1.6886	0.0929654	18.1638	9.99302e-74	6.78412e-71
Esam	474.837	1.69525	0.112712	15.0406	3.98178e-51	1.35159e-48
Pcdh9	38.5517	1.6983	0.261643	6.4909	8.53224e-11	2.1363e-09
Gm13284	12.4848	1.70006	0.296508	5.7336	9.83237e-09	1.78477e-07
Gm30735	11.1354	1.70063	0.29531	5.7588	8.47145e-09	1.55677e-07
Adm	32.6594	1.70153	0.278287	6.11428	9.69917e-10	2.09702e-08
Cd59a	75.336	1.70275	0.217292	7.83623	4.64265e-15	1.9594e-13
Cd200	20.1564	1.7064	0.292967	5.82455	5.72658e-09	1.08681e-07
Gstp-ps	1894.4	1.70646	0.107619	15.8565	1.26686e-56	5.67958e-54
Pilrb1	12.1417	1.71076	0.295112	5.797	6.75111e-09	1.26509e-07
Gm30692	40.8742	1.71326	0.263647	6.4983	8.12304e-11	2.04678e-09
Naprt	532.01	1.71966	0.110153	15.6116	6.06788e-55	2.40298e-52
Egr3	19.1196	1.73051	0.295105	5.86405	4.51719e-09	8.74047e-08
Pilra	159.345	1.74462	0.170791	10.2149	1.69973e-24	1.41214e-22
Dll1	108.123	1.75059	0.192804	9.07961	1.08967e-19	6.7779e-18
Atf3	292.539	1.75287	0.13729	12.7676	2.48576e-37	4.40778e-35
Akr1b8	264.159	1.75464	0.139214	12.6039	2.01081e-36	3.25027e-34
Ankrd33b	459.804	1.75999	0.120644	14.5883	3.33278e-48	9.89877e-46
Cd22	19.4482	1.76111	0.29465	5.97696	2.27333e-09	4.64061e-08
CN725425	173.469	1.7636	0.160305	11.0015	3.758e-28	3.9164e-26
Myo5b	159.619	1.764	0.170985	10.3167	5.92006e-25	5.0238e-23
Jcad	797.238	1.76469	0.0936674	18.8399	3.55383e-79	2.91181e-76
Tex16	28.768	1.76516	0.279739	6.31001	2.79018e-10	6.54467e-09
Zfp773	93.1387	1.76724	0.206259	8.56807	1.05233e-17	5.77468e-16
Grm6	17.4556	1.76959	0.297269	5.95283	2.63542e-09	5.31581e-08
Dcdc2a	32.0468	1.77046	0.281376	6.29216	3.13082e-10	7.29327e-09
AC166344,3	29.0549	1.7753	0.285908	6.20934	5.32063e-10	1.19268e-08
Cox7b2	29.2333	1.78122	0.280302	6.35465	2.08901e-10	4.99366e-09
Gm13147	226.912	1.78126	0.169771	10.4921	9.3891e-26	8.54768e-24
Pcdhb17	36.2053	1.78333	0.273436	6.52193	6.94086e-11	1.77145e-09
Zcwpw1	479.599	1.79235	0.117227	15.2896	8.97628e-53	3.28131e-50
Nuggc	67.3624	1.79291	0.224824	7.9747	1.52745e-15	6.82214e-14
L3hypdh	175.257	1.79459	0.161861	11.0872	1.44738e-28	1.5285e-26
Samd9l	257.688	1.79614	0.144445	12.4348	1.69193e-35	2.62757e-33
Gm44779	12.3417	1.81442	0.296703	6.11528	9.6388e-10	2.08776e-08
Pcdh8	37.4594	1.81485	0.265472	6.83633	8.12464e-12	2.36002e-10
S100a6	734.772	1.81641	0.0956603	18.9881	2.13838e-80	1.81464e-77
Tex101	17.3791	1.82366	0.297511	6.12972	8.80322e-10	1.91551e-08
Fosb	134.176	1.83356	0.192712	9.51453	1.82534e-21	1.287e-19
Alox15	22.2466	1.83564	0.293211	6.26048	3.83796e-10	8.82804e-09
Gm37867	12.7496	1.83739	0.29688	6.18899	6.05516e-10	1.34842e-08
Rassf9	35.6946	1.84077	0.2698	6.82272	8.93338e-12	2.57604e-10
Vrtn	172.848	1.84298	0.161987	11.3773	5.42239e-30	6.31575e-28
Hist1h2ba	135.044	1.8466	0.184821	9.99132	1.66354e-23	1.29598e-21
Tmem54	43.2778	1.85105	0.260579	7.10359	1.21559e-12	3.93511e-11
Gm16233	91.6022	1.86132	0.215714	8.62865	6.20823e-18	3.4791e-16
Zfp534	626.183	1.87619	0.120494	15.5708	1.14878e-54	4.47478e-52
Adamts1	208.388	1.8882	0.153525	12.299	9.17403e-35	1.3624e-32
Klk1b3	14.2612	1.88846	0.297933	6.33853	2.31975e-10	5.50095e-09
Ube2dnl1	33.2982	1.88871	0.278134	6.79064	1.11637e-11	3.1844e-10
Myrip	38.448	1.89033	0.265176	7.12857	1.01414e-12	3.32371e-11
Fam159b	55.9145	1.89096	0.263565	7.17453	7.25574e-13	2.43572e-11
C78283	33.4189	1.89416	0.274566	6.89874	5.2465e-12	1.56611e-10
Gm6639	40.7805	1.89728	0.263309	7.20553	5.78173e-13	1.95977e-11
Mmp25	95.0152	1.90188	0.220174	8.63804	5.71852e-18	3.21224e-16
Ldoc1	62.5978	1.90331	0.238017	7.99653	1.27971e-15	5.78086e-14
Gm44911	120.711	1.91475	0.192319	9.95613	2.37124e-23	1.8234e-21
AI481877	76.8284	1.92777	0.222623	8.65938	4.7435e-18	2.67086e-16
Nckap1l	122.422	1.93008	0.185097	10.4274	1.85827e-25	1.62931e-23
Ccno	32.3389	1.93259	0.276061	7.00061	2.54856e-12	7.90552e-11
Slc5a5	147.98	1.94278	0.192141	10.1112	4.92619e-24	3.99492e-22
Clca4a	80.6949	1.94285	0.226215	8.58847	8.8133e-18	4.88142e-16
1700030C10Rik	798.353	1.94618	0.098624	19.7333	1.11606e-86	1.20539e-83
Gm12260	981.292	1.95413	0.0995765	19.6244	9.57116e-86	9.88784e-83
Pilrb2	14.8627	1.95653	0.297628	6.57375	4.90646e-11	1.27972e-09
Prr19	91.1033	1.96013	0.209791	9.34325	9.34237e-21	6.27073e-19
8030474K03Rik	85.0595	1.96264	0.211593	9.27552	1.76748e-20	1.15695e-18
Gm6673	48.9384	1.96461	0.250772	7.83422	4.71747e-15	1.98744e-13
Gm21411	312.318	1.96548	0.145475	13.5108	1.35032e-41	2.7423e-39
Rasef	51.7434	1.97977	0.249732	7.92759	2.23445e-15	9.81384e-14
Gm11331	15.8372	1.98522	0.298132	6.65887	2.7594e-11	7.44225e-10
Gm43352	116.385	1.99724	0.193403	10.3268	5.32897e-25	4.53841e-23
Olfr914	18.6827	2.01174	0.29772	6.75714	1.40742e-11	3.93894e-10
Fgfbp1	415.853	2.01175	0.122638	16.404	1.7915e-60	8.68732e-58
Lef1	377.258	2.03188	0.12163	16.7055	1.19601e-62	6.31519e-60
C130073F10Rik	23.7692	2.03937	0.292661	6.96835	3.20669e-12	9.83151e-11
Lncenc1	196.325	2.05493	0.157588	13.0399	7.25497e-39	1.35736e-36
AC167192,1	202.535	2.05767	0.155574	13.2263	6.18244e-40	1.22417e-37
Tmem229a	263.811	2.06156	0.147314	13.9944	1.68747e-44	3.85539e-42
AU022751	43.7598	2.06883	0.261943	7.89801	2.83401e-15	1.23106e-13
Olfr510	15.4951	2.07	0.298106	6.94383	3.81603e-12	1.1536e-10
Gm21321	17.617	2.07601	0.297736	6.97266	3.11009e-12	9.58479e-11
4933427I04Rik	16.143	2.07643	0.298093	6.96572	3.26722e-12	9.9913e-11
Colec12	1154.7	2.08657	0.0930002	22.4362	1.74505e-111	3.45535e-108
T	35.1482	2.0868	0.274098	7.61332	2.67135e-14	1.04398e-12
E030030I06Rik	123.191	2.08834	0.192151	10.8682	1.63331e-27	1.63064e-25
Slc35f1	104.128	2.09179	0.199948	10.4617	1.29566e-25	1.14874e-23
Gsx1	111.305	2.09956	0.201125	10.4391	1.64417e-25	1.44693e-23
Gm16685	32.02	2.13044	0.279736	7.6159	2.61858e-14	1.02504e-12
Zfp980	334.306	2.14374	0.155336	13.8007	2.52481e-43	5.50385e-41
Fpr3	20.8576	2.15534	0.296791	7.26212	3.81066e-13	1.3199e-11
Tmem181b-ps	142.597	2.16696	0.181158	11.9617	5.63828e-33	7.744e-31
Gm17771	212.979	2.17559	0.159241	13.6623	1.70534e-42	3.6179e-40
Bglap3	68.1586	2.17668	0.233121	9.33714	9.89755e-21	6.60606e-19
Zfp640	118.435	2.18933	0.194408	11.2615	2.03291e-29	2.26779e-27
Gm16505	32.7188	2.21006	0.27921	7.9154	2.46459e-15	1.07847e-13
Gm10769	91.127	2.22258	0.219249	10.1372	3.77696e-24	3.084e-22
Dnmt3l	1041.33	2.23062	0.0996607	22.3822	5.87097e-111	1.07308e-107
Crlf1	280.49	2.24747	0.143554	15.6559	3.02889e-55	1.24085e-52
Gcm1	36.0144	2.25581	0.274856	8.20726	2.26295e-16	1.10411e-14
Taf7l	122.78	2.26348	0.192661	11.7485	7.18739e-32	9.28149e-30
Tnfrsf23	32.1187	2.27268	0.281486	8.07385	6.81131e-16	3.19849e-14
Mael	166.585	2.2727	0.178052	12.7643	2.59631e-37	4.56969e-35
Arntl2	425.521	2.29061	0.133312	17.1824	3.59794e-66	2.08514e-63
Vstm5	82.8127	2.2973	0.221892	10.3533	4.04488e-25	3.46969e-23
Car3	149.296	2.29965	0.183614	12.5244	5.49143e-36	8.69879e-34
C430049E01Rik	112.801	2.30006	0.201196	11.4319	2.89622e-30	3.40678e-28
Rex2	91.6063	2.31566	0.222461	10.4093	2.24906e-25	1.95037e-23
Vmn1r43	23.2323	2.32204	0.295059	7.86974	3.55389e-15	1.52151e-13
H60b	102.623	2.32439	0.206629	11.2491	2.33861e-29	2.58454e-27
Olfr1372-ps1	198.136	2.34086	0.164522	14.2282	6.11994e-46	1.61573e-43
Car2	6830.46	2.36636	0.0853909	27.7121	4.99647e-169	2.96803e-165
Soga3	1044.07	2.37396	0.0960461	24.7169	7.04257e-135	1.85932e-131
Skor1	50.0292	2.40969	0.25867	9.31568	1.21176e-20	7.99796e-19
Olfr416-ps1	22.2046	2.46233	0.296988	8.29103	1.12272e-16	5.6162e-15
Stk31	366.077	2.47474	0.133236	18.5741	5.2041e-77	3.74711e-74
Gm36551	21.6157	2.47501	0.296755	8.34024	7.41386e-17	3.76412e-15
Zfp600	121.324	2.55793	0.210506	12.1513	5.64433e-34	8.03083e-32
Zfp986	152.264	2.56697	0.187408	13.6972	1.05443e-42	2.25715e-40
Mroh6	189.417	2.60342	0.176611	14.741	3.51434e-49	1.11339e-46
Usp26	60.1338	2.60808	0.250893	10.3952	2.60711e-25	2.24448e-23
Akr1c21	30.0417	2.60853	0.289675	9.00501	2.15642e-19	1.32743e-17
Zfp981	542.192	2.61094	0.14149	18.4532	4.9173e-76	3.43647e-73
9330159F19Rik	176.339	2.66504	0.196557	13.5586	7.04849e-42	1.44379e-39
Gm21060	142.915	2.67151	0.193067	13.8372	1.51985e-43	3.37507e-41
Enpp3	956.249	2.67233	0.10066	26.548	2.70595e-155	1.0716e-151
Gm13223	58.6287	2.6951	0.255534	10.5469	5.24955e-26	4.85348e-24
Cdx2	102.719	2.69692	0.214233	12.5887	2.43537e-36	3.90992e-34
Gabrr1	33.969	2.72819	0.285574	9.55334	1.25576e-21	8.96038e-20
Klk1b24	27.3265	2.77805	0.293727	9.45792	3.1413e-21	2.18887e-19
Sytl2	74.8569	2.80073	0.240199	11.66	2.03997e-31	2.55114e-29
Zfp978	777.02	2.80886	0.118504	23.7027	3.37854e-124	7.29795e-121
Mmp9	222.228	2.88321	0.163673	17.6156	1.86849e-69	1.16835e-66
Rpl39l	139.13	2.89075	0.207415	13.937	3.77279e-44	8.53765e-42
Serpina3m	121.972	2.9175	0.206963	14.0968	3.97649e-45	9.64136e-43
AC156790,4	41.4917	2.95593	0.282117	10.4777	1.09384e-25	9.7965e-24
BC051019	82.6226	2.9642	0.234476	12.6418	1.24229e-36	2.03573e-34
Samd5	90.3538	2.9975	0.230261	13.0178	9.68969e-39	1.79872e-36
Olfr417	42.0764	3.00244	0.283948	10.5739	3.93707e-26	3.68302e-24
Gm6410	36.6552	3.00801	0.286872	10.4855	1.00664e-25	9.12926e-24
Shisa6	95.2373	3.04743	0.227734	13.3815	7.75174e-41	1.54781e-38
Gm19368	71.1386	3.06913	0.249092	12.3213	6.95872e-35	1.04649e-32
Platr16	98.8364	3.07748	0.226118	13.61	3.49053e-42	7.33969e-40
Cthrc1	230.893	3.09423	0.176531	17.528	8.76472e-69	5.33996e-66
Gm4969	176.038	3.16061	0.19208	16.4547	7.76232e-61	3.84251e-58
Speer4cos	39.3742	3.17631	0.288862	10.996	3.99679e-28	4.14706e-26
Pcdh17	161.359	3.31109	0.195635	16.9248	2.95266e-64	1.5945e-61
Vmn1r219	130.419	3.37716	0.218648	15.4456	8.07324e-54	2.99732e-51
Colgalt2	84.8122	3.38886	0.245831	13.7853	3.12308e-43	6.74614e-41
Gm5522	53.9147	3.41035	0.278358	12.2517	1.64576e-34	2.38445e-32
Gm13230	1241.36	3.44018	0.108319	31.7597	2.33413e-221	5.54613e-217
Gm1110	48.3205	3.49179	0.283311	12.3249	6.65184e-35	1.00672e-32
AC101831,1	56.0323	3.49686	0.276158	12.6625	9.5376e-37	1.57377e-34
Gm13193	56.9903	3.65391	0.277879	13.1493	1.71794e-39	3.3187e-37
Asb4	78.9525	3.66689	0.258091	14.2078	8.20185e-46	2.13515e-43
Clec2f	69.3983	3.82322	0.272765	14.0165	1.23479e-44	2.93398e-42
Gm4316	88.8302	3.83865	0.258156	14.8695	5.19901e-50	1.69224e-47
Gm37697	72.1796	3.84698	0.269317	14.2842	2.74542e-46	7.41295e-44
Tex13b	102.481	3.86126	0.245407	15.7341	8.83384e-56	3.74823e-53
Cyp2b23	824.227	4.12192	0.132953	31.0028	4.94482e-211	5.87469e-207
Platr5	204.02	4.33874	0.212495	20.4181	1.15546e-92	1.615e-89
Mep1b	351.59	4.46258	0.178509	24.9992	6.23501e-138	1.85188e-134
Mmp12	177.877	4.94485	0.24433	20.2384	4.49404e-91	5.62016e-88
Cd84	186.614	5.08397	0.247584	20.5343	1.06243e-93	1.57778e-90
CT010465,1	487.737	5.56785	0.197597	28.1778	1.09549e-174	8.67666e-171
2010005H15Rik	454.355	6.20623	0.231973	26.7541	1.10518e-157	5.25203e-154
