# Supplementary material for: Essential Cytoplasmic Role of the Histone Lysine Methyltransferase Setdb1 in Post-Transcriptional Regulation in Embryonic Stem Cells
Source: Research Square preprint supplement (doi:10.21203/rs.3.rs-145869/v1), 2021-02-05
Supplement: Supplementary file 4 [file 90ed724882b4fdb4dd70c3e6.xlsx]

## Sheet: Feuil1
Table 2: Table of the 128 out of the 291 differentially between KO+WT and KO+NLS (Fig. 2, differentially expressed genes were selected for a logFC >= 1.5 and p value< 0.01), and that are targets RNAs of hnRNP-C (Van Nostrand et al., 2016). Numbers refers to Log2 fold change KO+WT/KO+NLS in RNAseq and eCLIP/input for CLIP experiment.
Gene	baseMean	log2FoldChange	lfcSE	stat	pvalue	padj
Cubn	224.4485199	-3.65849012	0.182008059	-20.10070395	7.275E-90	8.64E-87
Srgn	38.54295086	-2.580031621	0.273568142	-9.431038289	4.060E-21	2.80E-19
Pdgfra	79.00804734	-2.218329812	0.217771032	-10.18652387	2.278E-24	1.87E-22
Col23a1	110.6122667	-2.136358992	0.235747685	-9.062057146	1.280E-19	7.94E-18
Zfp521	85.78028144	-2.051341018	0.207684136	-9.877215763	5.226E-23	3.91E-21
Col4a2	319.7267822	-1.989650918	0.135072547	-14.73023912	4.122E-49	1.29E-46
Fgf1	119.1250561	-1.886671224	0.184885767	-10.20452387	1.892E-24	1.57E-22
P2ry14	36.46477074	-1.838072676	0.27691209	-6.637748017	3.185E-11	8.54E-10
Dixdc1	184.8200738	-1.823139496	0.159836106	-11.40630573	3.889E-30	4.55E-28
Cobl	2195.432829	-1.809892645	0.07031058	-25.74139839	4.024E-146	1.37E-142
Aspn	65.78220702	-1.792889331	0.263900455	-6.793809163	1.092E-11	3.13E-10
Col4a1	877.9791031	-1.781613378	0.095678071	-18.62091651	2.175E-77	1.61E-74
Kit	560.244591	-1.773340032	0.114682724	-15.46300934	6.165E-54	2.33E-51
Ly75	447.4312852	-1.763330413	0.112926805	-15.61480826	5.772E-55	2.32E-52
Lrrc31	28.4109741	-1.74873445	0.279758271	-6.250876664	4.082E-10	9.34E-09
Lrrc34	765.6016205	-1.731159341	0.10382882	-16.67320634	2.053E-62	1.06E-59
Dab2	83.15531816	-1.723798426	0.208018072	-8.286772429	1.164E-16	5.80E-15
Mipol1	258.513367	-1.709193631	0.134470008	-12.71059366	5.164E-37	8.70E-35
Fxyd4	53.79317784	-1.698017611	0.256371537	-6.623268843	3.513E-11	9.32E-10
Igsf21	210.4357505	-1.68917946	0.154168716	-10.95669409	6.171E-28	6.29E-26
Sfrp1	1798.300728	-1.605459024	0.083482288	-19.23113356	2.031E-82	1.93E-79
Txlnb	22.65284927	-1.566208085	0.285819121	-5.479717666	4.260E-08	6.97E-07
Wnt16	20.54133472	-1.556886686	0.292730468	-5.318498945	1.046E-07	1.58E-06
Tgm2	106.9230278	-1.551522219	0.201694299	-7.692444603	1.443E-14	5.82E-13
Ampd3	132.8243804	-1.551404351	0.175031944	-8.863549807	7.751E-19	4.66E-17
Omg	21.21067198	-1.539923367	0.294506701	-5.228822857	1.706E-07	2.47E-06
Gata6	73.00990259	-1.521533905	0.21285062	-7.148364913	8.782E-13	2.91E-11
Sh3rf2	50.36157957	-1.508246986	0.242389801	-6.222402827	4.896E-10	1.10E-08
Lars2	7814.596242	-1.507607572	0.29770006	-5.064182957	4.102E-07	5.52E-06
Wnt3	82.53541338	1.501014227	0.210056948	7.145748987	8.951E-13	2.97E-11
Plxnc1	324.1750317	1.507444186	0.134655277	11.1948393	4.322E-29	4.69E-27
Grhl2	645.7288619	1.508548053	0.099580317	15.14905858	7.686E-52	2.65E-49
Nat8f2	10.62546562	1.510616202	0.293643203	5.144393562	2.684E-07	3.74E-06
Diras2	16.83500675	1.543243625	0.297231579	5.192058091	2.080E-07	2.97E-06
Gc	23.08472827	1.547006294	0.287084886	5.388672032	7.098E-08	1.11E-06
Hivep2	183.7654607	1.551759666	0.161732753	9.594591316	8.425E-22	6.10E-20
Dpy19l2	14.57372475	1.558953355	0.298123487	5.229220183	1.702E-07	2.47E-06
Col6a5	47.13944055	1.573209195	0.25439249	6.184180968	6.243E-10	1.39E-08
Slc25a31	53.42831106	1.589227274	0.247154993	6.430083634	1.275E-10	3.13E-09
Cd209d	19.45527326	1.593500683	0.293690283	5.425786197	5.770E-08	9.20E-07
Arl4c	222.7157075	1.604224558	0.148369257	10.81237842	3.008E-27	2.98E-25
Sned1	404.2123281	1.605286194	0.137505648	11.67432911	1.724E-31	2.17E-29
Zfp985	1645.96945	1.605489565	0.107464739	14.93968707	1.818E-50	6.09E-48
Gadd45g	64.4237387	1.614006215	0.225993626	7.141821855	9.210E-13	3.04E-11
Podxl	882.3639249	1.627694007	0.09042194	18.00109591	1.910E-72	1.26E-69
Mtus2	95.18547752	1.640886316	0.202851283	8.089109884	6.010E-16	2.84E-14
Insm1	191.6130191	1.64175947	0.156848747	10.4671507	1.223E-25	1.09E-23
Enpp2	41.45452699	1.648637879	0.260685852	6.324232274	2.545E-10	5.99E-09
Kcnk2	16.1494397	1.651836672	0.298134042	5.540583896	3.015E-08	5.05E-07
Nt5e	123.3781667	1.671590492	0.180765099	9.247307686	2.302E-20	1.50E-18
Tex19.1	1096.385752	1.675845703	0.089206989	18.78603597	9.825E-79	7.78E-76
Pnma5	26.26718747	1.682596122	0.282850215	5.948717848	2.703E-09	5.43E-08
Esam	474.8372327	1.695252293	0.11271206	15.04055818	3.982E-51	1.35E-48
Pcdh9	38.55168381	1.698300981	0.261643182	6.490904777	8.532E-11	2.14E-09
Adm	32.65940435	1.701527111	0.278287241	6.114283593	9.699E-10	2.10E-08
Cd59a	75.33604363	1.702753849	0.217292403	7.836232779	4.643E-15	1.96E-13
Cd200	20.15641436	1.706401027	0.292966881	5.824552668	5.727E-09	1.09E-07
Pilra	159.3450282	1.744624098	0.170791307	10.21494668	1.700E-24	1.41E-22
Dll1	108.123387	1.750588354	0.1928044	9.079607922	1.090E-19	6.78E-18
Atf3	292.5392081	1.752867825	0.137289881	12.76764032	2.486E-37	4.41E-35
Ankrd33b	459.8044725	1.759990447	0.12064376	14.58832551	3.333E-48	9.90E-46
Cd22	19.44823353	1.761113978	0.294650224	5.976964669	2.273E-09	4.64E-08
Myo5b	159.6193791	1.764002492	0.170984526	10.31673763	5.920E-25	5.02E-23
Zfp773	93.1386575	1.767238647	0.206258634	8.56807112	1.052E-17	5.77E-16
Grm6	17.45561304	1.769592165	0.297268974	5.952831686	2.635E-09	5.32E-08
Dcdc2a	32.04675633	1.770461605	0.281375878	6.292158439	3.131E-10	7.29E-09
Pcdhb17	36.20533381	1.783331909	0.273436242	6.52192956	6.941E-11	1.77E-09
Nuggc	67.36236756	1.792905295	0.224824027	7.974704999	1.527E-15	6.82E-14
L3hypdh	175.2567762	1.794586358	0.161861012	11.08720588	1.447E-28	1.53E-26
Samd9l	257.6884436	1.796137522	0.144444582	12.43478635	1.692E-35	2.63E-33
Pcdh8	37.45942066	1.814852334	0.26547164	6.836332249	8.125E-12	2.36E-10
S100a6	734.7723838	1.816408978	0.095660272	18.98812262	2.138E-80	1.81E-77
Fosb	134.175528	1.833562587	0.192711813	9.51453135	1.825E-21	1.29E-19
Alox15	22.24661609	1.835643807	0.293211378	6.26047946	3.838E-10	8.83E-09
Rassf9	35.69460052	1.840770162	0.269800117	6.822718175	8.933E-12	2.58E-10
Vrtn	172.8481871	1.842983044	0.161987056	11.3773476	5.422E-30	6.32E-28
Adamts1	208.3883665	1.888198312	0.153524956	12.29896661	9.174E-35	1.36E-32
Myrip	38.44800709	1.89032523	0.265175768	7.128574536	1.014E-12	3.32E-11
Fam159b	55.9145005	1.890957134	0.263565393	7.174527413	7.256E-13	2.44E-11
Mmp25	95.01521348	1.901875397	0.220174392	8.638040882	5.719E-18	3.21E-16
AI481877	76.82839317	1.927772276	0.222622519	8.659376794	4.744E-18	2.67E-16
Nckap1l	122.4224069	1.930082914	0.185096518	10.42744042	1.858E-25	1.63E-23
Ccno	32.33892479	1.93259463	0.276061009	7.000606996	2.549E-12	7.91E-11
Slc5a5	147.9799481	1.94278214	0.192141031	10.11122991	4.926E-24	3.99E-22
Clca4a	80.69488112	1.942845178	0.226215445	8.588472724	8.813E-18	4.88E-16
Pilrb2	14.86272323	1.95652988	0.297627802	6.573747027	4.906E-11	1.28E-09
8030474K03Rik	85.05948299	1.962636662	0.211593082	9.27552377	1.767E-20	1.16E-18
Rasef	51.7433945	1.979772451	0.249732044	7.927586791	2.234E-15	9.81E-14
Fgfbp1	415.8533774	2.011750722	0.122638067	16.40396628	1.792E-60	8.69E-58
Lef1	377.2581348	2.031882644	0.121629848	16.70546063	1.196E-62	6.32E-60
Tmem229a	263.8107924	2.061563006	0.147313871	13.99435772	1.687E-44	3.86E-42
AU022751	43.75979105	2.06882603	0.261942835	7.898005809	2.834E-15	1.23E-13
Colec12	1154.698775	2.086572656	0.093000236	22.43620807	1.745E-111	3.46E-108
T	35.1482478	2.086796107	0.274097899	7.613323991	2.671E-14	1.04E-12
E030030I06Rik	123.1913097	2.088341451	0.192150942	10.86823427	1.633E-27	1.63E-25
Slc35f1	104.1283798	2.091788977	0.199948097	10.46165985	1.296E-25	1.15E-23
Gsx1	111.3048038	2.099555022	0.201124758	10.43906801	1.644E-25	1.45E-23
Dnmt3l	1041.334153	2.230623232	0.099660699	22.38217521	5.871E-111	1.07E-107
Gcm1	36.01439699	2.255813758	0.274855925	8.207258992	2.263E-16	1.10E-14
Taf7l	122.7797857	2.263477468	0.192660789	11.74851135	7.187E-32	9.28E-30
Tnfrsf23	32.1186774	2.272678467	0.281486185	8.073854387	6.811E-16	3.20E-14
Mael	166.5852461	2.272697707	0.178051765	12.76425265	2.596E-37	4.57E-35
Arntl2	425.5212872	2.290611576	0.133311601	17.18238745	3.598E-66	2.09E-63
Car3	149.2963497	2.299652977	0.183614021	12.52438656	5.491E-36	8.70E-34
Car2	6830.458126	2.366357901	0.085390899	27.71206207	4.996E-169	2.97E-165
Soga3	1044.071181	2.373961113	0.096046144	24.71688113	7.043E-135	1.86E-131
Skor1	50.02924627	2.409688019	0.258670171	9.315677981	1.212E-20	8.00E-19
Usp26	60.13380851	2.608083744	0.250892831	10.39521031	2.607E-25	2.24E-23
9330159F19Rik	176.3392404	2.665039833	0.196557405	13.5585827	7.048E-42	1.44E-39
Enpp3	956.2486637	2.672327161	0.100660075	26.54803474	2.706E-155	1.07E-151
Cdx2	102.7194854	2.696916803	0.214232506	12.58873758	2.435E-36	3.91E-34
Gabrr1	33.96902578	2.728187424	0.285574074	9.553344211	1.256E-21	8.96E-20
Sytl2	74.85691288	2.80072565	0.240199064	11.66001902	2.040E-31	2.55E-29
Mmp9	222.228259	2.883208365	0.16367317	17.61564444	1.868E-69	1.17E-66
Rpl39l	139.1301261	2.890745825	0.207414658	13.93703729	3.773E-44	8.54E-42
Serpina3m	121.97221	2.917500853	0.206962613	14.09675311	3.976E-45	9.64E-43
BC051019	82.62264349	2.964196722	0.234476443	12.64176769	1.242E-36	2.04E-34
Samd5	90.35384168	2.997502117	0.230261437	13.01782079	9.690E-39	1.80E-36
Shisa6	95.23734244	3.047427337	0.227733566	13.38154665	7.752E-41	1.55E-38
Cthrc1	230.8929693	3.094227241	0.176530866	17.52796731	8.765E-69	5.34E-66
Gm4969	176.0382937	3.160608755	0.192079553	16.45468614	7.762E-61	3.84E-58
Pcdh17	161.3591976	3.311093809	0.195635434	16.92481643	2.953E-64	1.59E-61
Colgalt2	84.8121833	3.388861696	0.245830906	13.78533624	3.123E-43	6.75E-41
Asb4	78.95245131	3.666886163	0.258090559	14.20775008	8.202E-46	2.14E-43
Cyp2b23	824.2274559	4.121917704	0.132953161	31.00278079	4.945E-211	5.87E-207
Mep1b	351.5899934	4.462582987	0.178508937	24.99921331	6.235E-138	1.85E-134
Mmp12	177.8765183	4.944850408	0.244329943	20.23841348	4.494E-91	5.62E-88
Cd84	186.6139698	5.08397475	0.247584008	20.53434219	1.062E-93	1.58E-90
