# Supplementary material for: Essential Cytoplasmic Role of the Histone Lysine Methyltransferase Setdb1 in Post-Transcriptional Regulation in Embryonic Stem Cells
Source: Research Square preprint supplement (doi:10.21203/rs.3.rs-145869/v1), 2021-02-05
Supplement: Supplementary file 5 [file c3e0ff5bd4839a3a3755c770.xlsx]

## Sheet: degCorrelationClusters
Table 3: Gene composition of the clusters described in Figure 4G-I.
Gene Name	Cluster #
Cubn	2
Pdgfra	2
Zfp521	2
Col4a2	2
Fgf1	2
Dixdc1	2
Cobl	2
Col4a1	2
Kit	2
Ly75	2
Lrrc34	2
Dab2	2
Mipol1	2
Igsf21	2
Sfrp1	2
Ephx1	2
Txlnb	2
Tgm2	2
Ampd3	2
Gata6	2
Wnt3	3
Plxnc1	3
Grhl2	3
Clu	3
Arl4c	3
Mtus2	3
Insm1	3
Fthl17f	3
Enpp2	3
Gm44732	3
Cd200	3
Dll1	3
Cd22	3
Myo5b	3
Zfp773	3
Gm37867	3
Rassf9	3
Vrtn	3
Myrip	3
Ldoc1	3
AI481877	3
Ccno	3
Clca4a	3
1700030C10Rik	3
Prr19	3
8030474K03Rik	3
Gm6673	3
T	3
Gsx1	3
Tmem181b-ps	3
Bglap3	3
Crlf1	3
Gcm1	3
Tnfrsf23	3
Arntl2	3
Skor1	3
Gm36551	3
Mroh6	3
Gm21060	3
Enpp3	3
Gm13223	3
Sytl2	3
Samd5	3
Gm6410	3
Gm19368	3
Gm4969	3
Vmn1r219	3
Colgalt2	3
Gm5522	3
Gm1110	3
AC101831.1	3
Gm13193	3
Clec2f	3
Gm4316	3
Cyp2b23	3
Cd84	3
Raet1d	4
Gpx1	4
Gm8935	4
Cdkn1c	4
Glyatl3	4
2410141K09Rik	4
Podxl	4
Nt5e	4
Tex19.1	4
Esam	4
Gm30735	4
Gstp-ps	4
Naprt	4
Egr3	4
Atf3	4
Ankrd33b	4
CN725425	4
Jcad	4
Nuggc	4
L3hypdh	4
Gm44779	4
Pcdh8	4
S100a6	4
Adamts1	4
Nckap1l	4
Gm12260	4
Gm43352	4
Fgfbp1	4
Lef1	4
Lncenc1	4
Olfr510	4
E030030I06Rik	4
Gm16685	4
Gm16505	4
Dnmt3l	4
Taf7l	4
Vstm5	4
H60b	4
Olfr1372-ps1	4
Soga3	4
Stk31	4
Cdx2	4
Gabrr1	4
Klk1b24	4
Mmp9	4
BC051019	4
Shisa6	4
Pcdh17	4
Asb4	4
Gm37697	4
Tex13b	4
Platr5	4
Mep1b	4
Mmp12	4
CT010465.1	4
Gm13241	5
Gc	5
Cd209d	5
Gadd45g	5
Clca3b	5
Pnma5	5
Pcdh9	5
Cd59a	5
Akr1b8	5
Tex16	5
Cox7b2	5
Samd9l	5
Hist1h2ba	5
Zfp534	5
Klk1b3	5
C78283	5
Gm21411	5
Rasef	5
AC167192.1	5
Tmem229a	5
Gm21321	5
Colec12	5
Slc35f1	5
Zfp980	5
Gm17771	5
Zfp640	5
Mael	5
Car3	5
C430049E01Rik	5
Car2	5
Zfp986	5
Usp26	5
Akr1c21	5
Zfp981	5
9330159F19Rik	5
Zfp978	5
Rpl39l	5
Serpina3m	5
AC156790.4	5
Platr16	5
Cthrc1	5
Gm13230	5
2010005H15Rik	5
Genes with no significant clustered correlation
Rian	1
Meg3	1
Srgn	1
Mirg	1
Gm37899	1
Col23a1	1
Gm38162	1
Gm38387	1
AL591892.1	1
Gm37570	1
Gm12002	1
Gm38001	1
Gm15533	1
H19	1
P2ry14	1
Gm43019	1
Gm48889	1
Gm37621	1
Aspn	1
Gm43164	1
Dglucy	1
4930517O19Rik	1
Lrrc31	1
Gm37204	1
C79798	1
Gm47479	1
Gm43168	1
Fxyd4	1
Gm15564	1
Fut9	1
Gm47342	1
Gm37274	1
Bcas3os1	1
Gm43984	1
Gm38009	1
Gm26690	1
Gm26814	1
Ly6g6e	1
Gm43982	1
Gm43707	1
Zbtb20	1
Gm47026	1
Wnt16	1
Srrm4os	1
Gm29488	1
Omg	1
Gm37137	1
Gm44704	1
Gm44434	1
Grin1	1
Gm48600	1
Gm4117	1
Lars2	1
AC120375.2	1
Gm45280	1
Znf41-ps	1
Olfr913	1
Foxi3	1
Nat8f2	1
Tesc	1
Diras2	1
Gm38391	1
Gm4779	1
Hivep2	1
Dpy19l2	1
Gm37416	1
Col6a5	1
Hist1h2aa	1
Slc25a31	1
Nlrp4c	1
Sned1	1
Zfp985	1
Zfp992	1
1700097N02Rik	1
Gm13245	1
Gm40849	1
Kcnk2	1
Gm37352	1
Nlrp9b	1
Gm19792	1
Gm13284	1
Adm	1
Pilrb1	1
Gm30692	1
Pilra	1
Grm6	1
Dcdc2a	1
Gm13147	1
Pcdhb17	1
Zcwpw1	1
Tex101	1
Fosb	1
Alox15	1
Tmem54	1
Gm16233	1
Ube2dnl1	1
Fam159b	1
Gm6639	1
Mmp25	1
Gm44911	1
Slc5a5	1
Pilrb2	1
Gm11331	1
Olfr914	1
C130073F10Rik	1
AU022751	1
4933427I04Rik	1
Fpr3	1
Gm10769	1
Rex2	1
Vmn1r43	1
Olfr416-ps1	1
Zfp600	1
Olfr417	1
Speer4cos	1
